# Supplementary material for: RNA sequencing uncovers antisense RNAs and novel small RNAs in Streptococcus pyogenes
Source: PubMed Central journal article supplement — RNA Biol. 2015 Nov 18;13(2):177–95. doi: 10.1080/15476286.2015.1110674 (PMC4829319; doi:10.1080/15476286.2015.1110674), 2015-11-18
Supplement: krnb-13-02-1110674-s001.pdf [file krnb-13-02-1110674-s001.pdf]

| Name             | Dir | Location | 5' sum | Sliding window ratio | 5' Ratio    | Promoter    | Terminator | Type       |          |
|------------------|-----|----------|--------|----------------------|-------------|-------------|------------|------------|----------|
| Spy_sRNA_205+    | +   | 205      | 537    | 0.964093357          |             | 1 YES       | NO         | upstream   |          |
| Spy_sRNA_3452+   | +   | 3452     | 42     |                      | 1           | 1 YES       | NO         | upstream   |          |
| Spy_sRNA_22517+  | +   | 22517    | 28     | 0.56                 | 0.666666667 | NO          | NO         | upstream   |          |
| Spy_sRNA_22595+  | +   | 22595    | 871    | 0.927582535          | 0.899793388 | NO          | NO         | upstream   |          |
| Spy_sRNA_22607+  | +   | 22607    | 16448  | 0.994377607          | 0.940853449 | NO          | NO         | downstream |          |
| Spy_sRNA_22679+  | +   | 22679    | 1577   | 0.888450704          | 0.732466326 | NO          | NO         | upstream   |          |
| Spy_sRNA_22687+  | +   | 22687    | 3485   | 0.941891892          | 0.623100304 | NO          | NO         | downstream |          |
| Spy_sRNA_22868+  | +   | 22868    | 8827   | 0.986697966          | 0.808629535 | NO          | NO         | downstream |          |
| Spy_sRNA_22942+  | +   | 22942    | 4230   | 0.860981071          | 0.711761736 | NO          | NO         | downstream |          |
| Spy_sRNA_28438+  | +   | 28438    | 70     | 0.945945946          | 0.945945946 | NO          | NO         | downstream |          |
| Spy_sRNA_28785+  | +   | 28785    | 89     | 0.946808511          | 0.956989247 | NO          | NO         | upstream   |          |
| Spy_sRNA_28976+  | +   | 28976    | 264    | 0.956521739          | 0.96        | NO          | YES        | upstream   |          |
| Spy_sRNA_28985+  | +   | 28985    | 2307   | 0.981702128          | 0.878857143 | NO          | YES        | downstream |          |
| Spy_sRNA_30516+  | +   | 30516    | 103    | 0.962616822          | 0.980952381 | YES         | NO         | upstream   |          |
| Spy_sRNA_33952+  | +   | 33952    | 105    | 0.972222222          | 0.92920354  | YES         | NO         | upstream   |          |
| Spy_sRNA_63584+  | +   | 63584    | 140    | 0.979020979          | 0.972222222 | YES         | YES        | IGR        |          |
| Spy_sRNA_73055+  | +   | 73055    | 12     | 0.8                  | 0.571428571 | NO          | NO         | downstream |          |
| Spy_sRNA_73113+  | +   | 73113    | 56     | 0.98245614           | 0.717948718 | NO          | NO         | IGR        |          |
| Spy_sRNA_75867+  | +   | 75867    | 451    | 0.941544885          | 0.937629938 | YES         | NO         | IGR        |          |
| Spy_sRNA_78598+  | +   | 78598    | 157    | 0.97515528           | 0.897142857 | NO          | NO         | IGR        |          |
| Spy_sRNA_84729+  | +   | 84729    | 167    | 0.994047619          | 0.954285714 | NO          | NO         | upstream   |          |
| Spy_sRNA_85005+  | +   | 85005    | 283    | 0.933993399          | 0.904153355 | NO          | NO         | upstream   |          |
| Spy_sRNA_85105+  | +   | 85105    | 241    | 0.983673469          | 0.665745856 | NO          | NO         | upstream   |          |
| Spy_sRNA_85111+  | +   | 85111    | 3021   | 0.937325473          | 0.917958067 | NO          | NO         | downstream |          |
| Spy_sRNA_85192+  | +   | 85192    | 317    | 0.951951952          | 0.946268657 | NO          | NO         | upstream   |          |
| Spy_sRNA_85346+  | +   | 85346    | 170    | 0.977011494          | 0.923913043 | NO          | YES        | upstream   |          |
| Spy_sRNA_85365+  | +   | 85365    | 336    | 0.884210526          | 0.585365854 | NO          | YES        | downstream |          |
| Spy_sRNA_90946-  | -   | 90946    | 26     | 0.896551724          | 0.928571429 | YES         | NO         | upstream   |          |
| Spy_sRNA_93359+  | +   | 93359    | 712    | 0.994413408          | 0.99719888  | YES         | YES        | downstream |          |
| Spy_sRNA_109928- | -   | 109928   | 17     | 0.85                 | 0.944444444 | YES         | NO         | upstream   |          |
| Spy_sRNA_110234- | -   | 110234   | 10     |                      | 1           | 1 YES       | NO         | IGR        |          |
| Spy_sRNA_111629+ | +   | 111629   | 93     | 0.989361702          | 0.939393939 | NO          | YES        | IGR        |          |
| Spy_sRNA_116594- | -   | 116594   | 19     | 0.863636364          |             | 1 YES       | NO         | IGR        |          |
| Spy_sRNA_116781+ | +   | 116781   | 270    | 0.97826087           | 0.974729242 | NO          | NO         | IGR        |          |
| Spy_sRNA_132392+ | +   | 132392   | 20     | 0.833333333          | 0.833333333 | NO          | NO         | upstream   |          |
| Spy_sRNA_145677+ | +   | 145677   | 63     | 0.538461538          |             | 1 YES       | NO         | IGR        |          |
| Spy_sRNA_148619+ | +   | 148619   | 15     |                      | 1           | 1 YES       | NO         | IGR        |          |
| Spy_sRNA_155629+ | +   | 155629   | 46     |                      | 1           | 1 YES       | YES        | IGR        |          |
| Spy_sRNA_157098+ | +   | 157098   | 19     | 0.678571429          |             | 1 YES       | NO         | upstream   |          |
| Spy_sRNA_183525- | -   | 183525   | 70     | 0.945945946          | 0.909090909 | NO          | YES        | downstream |          |
| Spy_sRNA_184532+ | +   | 184532   | 6498   | 0.979942693          | 0.980978261 | YES         | NO         | IGR        |          |
| Spy_sRNA_185785+ | +   | 185785   | 87     | 0.97752809           | 0.896907216 | NO          | YES        | downstream |          |
| Spy_sRNA_190336+ | +   | 190336   | 313    | 0.907246377          | 0.931547619 | YES         | NO         | IGR        |          |
| Spy_sRNA_190345+ | +   | 190345   | 1368   | 0.93891558           | 0.767246214 | NO          | NO         | IGR        |          |
| Spy_sRNA_192528- | -   | 192528   | 10     |                      | 1           | 1 NO        | NO         | Antisense  |          |
| Spy_sRNA_199636- | -   | 199636   | 18     | 0.529411765          | 0.529411765 | YES         | NO         | upstream   |          |
| Spy_sRNA_199875+ | +   | 199875   | 32     |                      | 1           | 1 NO        | NO         | upstream   |          |
| Spy_sRNA_204807+ | +   | 204807   | 31     |                      | 1           | 1 YES       | YES        | upstream   |          |
| Spy_sRNA_207513+ | +   | 207513   | 37     |                      | 1           | 1 YES       | NO         | upstream   |          |
| Spy_sRNA_208331+ | +   | 208331   | 86     | 0.966292135          | 0.934782609 | YES         | NO         | IGR        |          |
| Spy_sRNA_213738+ | +   | 213738   | 586    | 0.981574539          | 0.98487395  | YES         | YES        | IGR        |          |
| Spy_sRNA_214164+ | +   | 214164   | 60     |                      | 1           | 0.983606557 | YES        | NO         | upstream |
| Spy_sRNA_216511+ | +   | 216511   | 75     | 0.789473684          | 0.914634146 | YES         | NO         | IGR        |          |
| Spy_sRNA_224567- | -   | 224567   | 120    | 0.967741935          | 0.902255639 | YES         | NO         | upstream   |          |
| Spy_sRNA_224570- | -   | 224570   | 11     | 0.846153846          |             | 1 YES       | NO         | upstream   |          |
| Spy_sRNA_232198+ | +   | 232198   | 49     | 0.590361446          | 0.765625    | YES         | NO         | upstream   |          |
| Spy_sRNA_235753+ | +   | 235753   | 591    | 0.985                | 0.942583732 | YES         | NO         | IGR        |          |
| Spy_sRNA_237128+ | +   | 237128   | 73     | 0.948051948          | 0.829545455 | YES         | NO         | upstream   |          |

|                  |   |        |      |             |             |     |     |            |
|------------------|---|--------|------|-------------|-------------|-----|-----|------------|
| Spy_sRNA_239475+ | + | 239475 | 1075 | 0.994449584 | 0.997217069 | YES | NO  | IGR        |
| Spy_sRNA_243404- | - | 243404 | 11   | 0.785714286 | 0.916666667 | YES | NO  | upstream   |
| Spy_sRNA_246499+ | + | 246499 | 20   | 0.571428571 | 0.606060606 | YES | NO  | upstream   |
| Spy_sRNA_248497+ | + | 248497 | 21   | 1           | 1           | YES | NO  | downstream |
| Spy_sRNA_255200- | - | 255200 | 18   | 1           | 1           | YES | NO  | IGR        |
| Spy_sRNA_256844+ | + | 256844 | 117  | 1           | 1           | YES | NO  | IGR        |
| Spy_sRNA_279320+ | + | 279320 | 30   | 1           | 0.833333333 | YES | NO  | upstream   |
| Spy_sRNA_280485+ | + | 280485 | 10   | 1           | 1           | YES | NO  | upstream   |
| Spy_sRNA_289278+ | + | 289278 | 89   | 1           | 1           | YES | NO  | upstream   |
| Spy_sRNA_294211+ | + | 294211 | 79   | 0.951807229 | 0.951807229 | YES | NO  | upstream   |
| Spy_sRNA_298224+ | + | 298224 | 14   | 0.583333333 | 0.518518519 | NO  | YES | IGR        |
| Spy_sRNA_301694+ | + | 301694 | 19   | 0.904761905 | 0.904761905 | YES | NO  | upstream   |
| Spy_sRNA_304314+ | + | 304314 | 130  | 0.896551724 | 0.872483221 | YES | NO  | upstream   |
| Spy_sRNA_307010- | - | 307010 | 20   | 0.769230769 | 0.588235294 | NO  | NO  | IGR        |
| Spy_sRNA_308033- | - | 308033 | 17   | 1           | 1           | YES | NO  | upstream   |
| Spy_sRNA_308381- | - | 308381 | 15   | 1           | 1           | YES | NO  | upstream   |
| Spy_sRNA_312070+ | + | 312070 | 10   | 0.909090909 | 1           | YES | NO  | upstream   |
| Spy_sRNA_318401+ | + | 318401 | 131  | 0.873333333 | 0.992424242 | YES | NO  | downstream |
| Spy_sRNA_318404+ | + | 318404 | 641  | 0.971212121 | 0.809343434 | YES | NO  | IGR        |
| Spy_sRNA_319190+ | + | 319190 | 88   | 0.988764045 | 1           | YES | YES | IGR        |
| Spy_sRNA_319330+ | + | 319330 | 72   | 0.642857143 | 0.595041322 | NO  | YES | IGR        |
| Spy_sRNA_323924+ | + | 323924 | 13   | 1           | 1           | YES | NO  | upstream   |
| Spy_sRNA_324852+ | + | 324852 | 20   | 0.714285714 | 1           | YES | NO  | upstream   |
| Spy_sRNA_332124+ | + | 332124 | 25   | 1           | 1           | YES | NO  | upstream   |
| Spy_sRNA_334719+ | + | 334719 | 177  | 0.977900552 | 0.786666667 | YES | NO  | downstream |
| Spy_sRNA_335396+ | + | 335396 | 1553 | 0.987285442 | 0.735670298 | NO  | YES | downstream |
| Spy_sRNA_335649+ | + | 335649 | 47   | 1           | 1           | NO  | NO  | IGR        |
| Spy_sRNA_336387+ | + | 336387 | 23   | 1           | 1           | YES | NO  | upstream   |
| Spy_sRNA_340904- | - | 340904 | 31   | 0.96875     | 1           | YES | YES | upstream   |
| Spy_sRNA_342470- | - | 342470 | 10   | 1           | 1           | YES | NO  | upstream   |
| Spy_sRNA_349331+ | + | 349331 | 131  | 1           | 1           | YES | NO  | IGR        |
| Spy_sRNA_350644+ | + | 350644 | 22   | 1           | 0.785714286 | YES | NO  | IGR        |
| Spy_sRNA_360152- | - | 360152 | 11   | 1           | 0.846153846 | YES | NO  | upstream   |
| Spy_sRNA_363023- | - | 363023 | 27   | 1           | 1           | YES | NO  | upstream   |
| Spy_sRNA_367128+ | + | 367128 | 12   | 1           | 1           | YES | YES | upstream   |
| Spy_sRNA_371426+ | + | 371426 | 35   | 0.972222222 | 1           | YES | NO  | IGR        |
| Spy_sRNA_374062+ | + | 374062 | 15   | 1           | 0.882352941 | NO  | YES | downstream |
| Spy_sRNA_374194- | - | 374194 | 21   | 0.954545455 | 0.7         | NO  | NO  | downstream |
| Spy_sRNA_379816+ | + | 379816 | 71   | 0.934210526 | 1           | YES | NO  | upstream   |
| Spy_sRNA_382162+ | + | 382162 | 110  | 0.674846626 | 1           | YES | NO  | upstream   |
| Spy_sRNA_383044+ | + | 383044 | 29   | 0.725       | 0.878787879 | YES | NO  | upstream   |
| Spy_sRNA_384678- | - | 384678 | 10   | 1           | 1           | NO  | NO  | Antisense  |
| Spy_sRNA_388211+ | + | 388211 | 34   | 0.739130435 | 0.772727273 | YES | NO  | IGR        |
| Spy_sRNA_392987+ | + | 392987 | 128  | 0.882758621 | 0.96969697  | YES | YES | Antisense  |
| Spy_sRNA_402107+ | + | 402107 | 28   | 1           | 0.903225806 | YES | YES | IGR        |
| Spy_sRNA_403520+ | + | 403520 | 92   | 1           | 0.978723404 | YES | NO  | upstream   |
| Spy_sRNA_409843- | - | 409843 | 11   | 1           | 1           | YES | NO  | upstream   |
| Spy_sRNA_413307- | - | 413307 | 19   | 1           | 1           | YES | NO  | upstream   |
| Spy_sRNA_413428+ | + | 413428 | 308  | 0.990353698 | 0.993548387 | YES | NO  | upstream   |
| Spy_sRNA_416968+ | + | 416968 | 682  | 0.995620438 | 0.995620438 | YES | YES | downstream |
| Spy_sRNA_450289+ | + | 450289 | 17   | 1           | 1           | YES | NO  | IGR        |
| Spy_sRNA_455336+ | + | 455336 | 10   | 1           | 0.909090909 | NO  | YES | IGR        |
| Spy_sRNA_468277- | - | 468277 | 18   | 1           | 1           | YES | NO  | Antisense  |
| Spy_sRNA_471090+ | + | 471090 | 29   | 0.763157895 | 0.707317073 | YES | NO  | upstream   |
| Spy_sRNA_474768- | - | 474768 | 73   | 0.890243902 | 0.924050633 | YES | NO  | upstream   |
| Spy_sRNA_474941+ | + | 474941 | 25   | 0.862068966 | 0.862068966 | YES | NO  | upstream   |
| Spy_sRNA_477376+ | + | 477376 | 13   | 0.541666667 | 0.8125      | YES | NO  | IGR        |
| Spy_sRNA_477597- | - | 477597 | 12   | 1           | 0.8         | NO  | YES | Antisense  |
| Spy_sRNA_477704+ | + | 477704 | 25   | 0.694444444 | 0.892857143 | NO  | NO  | downstream |

|                  |   |        |      |             |             |     |     |            |
|------------------|---|--------|------|-------------|-------------|-----|-----|------------|
| Spy_sRNA_479555- | - | 479555 | 38   | 0.95        | 0.974358974 | YES | NO  | upstream   |
| Spy_sRNA_479679+ | + | 479679 | 26   | 0.962962963 | 0.962962963 | YES | NO  | upstream   |
| Spy_sRNA_480655+ | + | 480655 | 42   | 0.933333333 | 0.512195122 | NO  | NO  | downstream |
| Spy_sRNA_480696- | - | 480696 | 15   | 0.833333333 | 0.535714286 | NO  | NO  | downstream |
| Spy_sRNA_482204- | - | 482204 | 11   | 1           | 0.647058824 | YES | NO  | upstream   |
| Spy_sRNA_482963- | - | 482963 | 65   | 1           | 1           | YES | YES | IGR        |
| Spy_sRNA_483933- | - | 483933 | 10   | 1           | 1           | YES | NO  | upstream   |
| Spy_sRNA_487471- | - | 487471 | 11   | 1           | 1           | YES | NO  | upstream   |
| Spy_sRNA_490543+ | + | 490543 | 26   | 0.866666667 | 0.928571429 | YES | NO  | upstream   |
| Spy_sRNA_492136+ | + | 492136 | 946  | 0.932938856 | 0.997890295 | YES | NO  | IGR        |
| Spy_sRNA_493609+ | + | 493609 | 26   | 0.764705882 | 1           | YES | NO  | upstream   |
| Spy_sRNA_499566+ | + | 499566 | 28   | 0.651162791 | 0.666666667 | YES | NO  | upstream   |
| Spy_sRNA_500055+ | + | 500055 | 62   | 0.939393939 | 0.939393939 | YES | YES | IGR        |
| Spy_sRNA_516068+ | + | 516068 | 302  | 0.949685535 | 0.875362319 | YES | NO  | downstream |
| Spy_sRNA_519904+ | + | 519904 | 64   | 1           | 1           | NO  | NO  | IGR        |
| Spy_sRNA_529558+ | + | 529558 | 24   | 1           | 1           | YES | YES | IGR        |
| Spy_sRNA_531081+ | + | 531081 | 22   | 0.916666667 | 0.956521739 | YES | YES | IGR        |
| Spy_sRNA_531128+ | + | 531128 | 55   | 0.982142857 | 0.555555556 | NO  | NO  | IGR        |
| Spy_sRNA_531147- | - | 531147 | 25   | 0.714285714 | 0.806451613 | YES | NO  | downstream |
| Spy_sRNA_532788- | - | 532788 | 64   | 1           | 1           | YES | YES | IGR        |
| Spy_sRNA_544833+ | + | 544833 | 20   | 1           | 1           | YES | NO  | IGR        |
| Spy_sRNA_573707+ | + | 573707 | 14   | 1           | 1           | YES | NO  | upstream   |
| Spy_sRNA_576081- | - | 576081 | 238  | 0.991666667 | 1           | YES | NO  | upstream   |
| Spy_sRNA_577456+ | + | 577456 | 21   | 1           | 1           | YES | NO  | upstream   |
| Spy_sRNA_578076+ | + | 578076 | 11   | 0.846153846 | 0.916666667 | YES | NO  | upstream   |
| Spy_sRNA_579683+ | + | 579683 | 259  | 0.973684211 | 0.973684211 | YES | NO  | downstream |
| Spy_sRNA_580337+ | + | 580337 | 32   | 1           | 0.96969697  | YES | YES | upstream   |
| Spy_sRNA_580354+ | + | 580354 | 181  | 0.952631579 | 0.815315315 | NO  | YES | IGR        |
| Spy_sRNA_583888+ | + | 583888 | 15   | 1           | 0.9375      | YES | NO  | IGR        |
| Spy_sRNA_586507+ | + | 586507 | 38   | 1           | 1           | YES | NO  | upstream   |
| Spy_sRNA_598538+ | + | 598538 | 22   | 1           | 1           | YES | NO  | IGR        |
| Spy_sRNA_598591+ | + | 598591 | 41   | 1           | 0.976190476 | NO  | NO  | IGR        |
| Spy_sRNA_614604+ | + | 614604 | 36   | 0.923076923 | 0.947368421 | YES | NO  | upstream   |
| Spy_sRNA_614841+ | + | 614841 | 30   | 0.909090909 | 0.517241379 | NO  | NO  | upstream   |
| Spy_sRNA_621599+ | + | 621599 | 11   | 1           | 0.916666667 | NO  | NO  | upstream   |
| Spy_sRNA_623726+ | + | 623726 | 33   | 1           | 1           | YES | YES | IGR        |
| Spy_sRNA_639369+ | + | 639369 | 757  | 0.994743758 | 0.994743758 | YES | NO  | upstream   |
| Spy_sRNA_640102- | - | 640102 | 139  | 1           | 1           | YES | NO  | upstream   |
| Spy_sRNA_640195+ | + | 640195 | 27   | 0.75        | 1           | YES | NO  | upstream   |
| Spy_sRNA_644794+ | + | 644794 | 26   | 1           | 1           | YES | NO  | upstream   |
| Spy_sRNA_658201+ | + | 658201 | 313  | 0.993650794 | 0.993650794 | YES | NO  | upstream   |
| Spy_sRNA_661400+ | + | 661400 | 1010 | 0.992141454 | 0.989226249 | YES | YES | downstream |
| Spy_sRNA_668479+ | + | 668479 | 72   | 0.98630137  | 0.96        | YES | NO  | upstream   |
| Spy_sRNA_672321- | - | 672321 | 18   | 1           | 1           | YES | NO  | IGR        |
| Spy_sRNA_676268+ | + | 676268 | 178  | 1           | 0.994413408 | YES | NO  | IGR        |
| Spy_sRNA_680207+ | + | 680207 | 79   | 0.580882353 | 0.637096774 | YES | YES | IGR        |
| Spy_sRNA_687854+ | + | 687854 | 17   | 1           | 1           | YES | NO  | upstream   |
| Spy_sRNA_693150+ | + | 693150 | 160  | 1           | 0.909090909 | YES | NO  | IGR        |
| Spy_sRNA_694150+ | + | 694150 | 21   | 1           | 1           | YES | NO  | IGR        |
| Spy_sRNA_699921+ | + | 699921 | 273  | 0.992727273 | 0.978494624 | YES | NO  | IGR        |
| Spy_sRNA_704619+ | + | 704619 | 36   | 0.6         | 0.818181818 | YES | NO  | IGR        |
| Spy_sRNA_709052+ | + | 709052 | 37   | 1           | 0.948717949 | NO  | NO  | upstream   |
| Spy_sRNA_712512+ | + | 712512 | 17   | 1           | 1           | YES | NO  | downstream |
| Spy_sRNA_712646+ | + | 712646 | 11   | 0.523809524 | 0.523809524 | YES | NO  | upstream   |
| Spy_sRNA_723539+ | + | 723539 | 151  | 0.961783439 | 0.993421053 | YES | NO  | upstream   |
| Spy_sRNA_728180+ | + | 728180 | 17   | 0.85        | 0.944444444 | NO  | NO  | Antisense  |
| Spy_sRNA_730063- | - | 730063 | 43   | 0.955555556 | 0.934782609 | YES | NO  | upstream   |
| Spy_sRNA_733950+ | + | 733950 | 51   | 0.980769231 | 0.980769231 | NO  | NO  | upstream   |
| Spy_sRNA_737211+ | + | 737211 | 12   | 1           | 1           | YES | NO  | upstream   |

|                  |   |        |      |             |             |     |     |            |
|------------------|---|--------|------|-------------|-------------|-----|-----|------------|
| Spy_sRNA_737945+ | + | 737945 | 54   | 0.830769231 | 0.84375     | NO  | YES | downstream |
| Spy_sRNA_743787+ | + | 743787 | 50   | 1           | 1           | YES | NO  | upstream   |
| Spy_sRNA_744487+ | + | 744487 | 12   | 0.923076923 | 1           | YES | YES | IGR        |
| Spy_sRNA_746178+ | + | 746178 | 405  | 0.948477752 | 0.849056604 | YES | NO  | upstream   |
| Spy_sRNA_752328+ | + | 752328 | 42   | 1           | 0.976744186 | YES | NO  | upstream   |
| Spy_sRNA_758046+ | + | 758046 | 14   | 0.56        | 0.875       | YES | NO  | upstream   |
| Spy_sRNA_758340+ | + | 758340 | 11   | 1           | 0.55        | YES | NO  | upstream   |
| Spy_sRNA_758343+ | + | 758343 | 78   | 0.987341772 | 0.795918367 | YES | NO  | upstream   |
| Spy_sRNA_758432+ | + | 758432 | 41   | 1           | 0.976190476 | NO  | NO  | downstream |
| Spy_sRNA_758483+ | + | 758483 | 48   | 0.979591837 | 0.539325843 | NO  | YES | IGR        |
| Spy_sRNA_759981+ | + | 759981 | 51   | 0.980769231 | 0.980769231 | YES | NO  | upstream   |
| Spy_sRNA_759999+ | + | 759999 | 83   | 0.965116279 | 0.62406015  | NO  | NO  | IGR        |
| Spy_sRNA_760746- | - | 760746 | 541  | 0.916949153 | 0.937608319 | YES | NO  | upstream   |
| Spy_sRNA_760908+ | + | 760908 | 28   | 0.965517241 | 0.965517241 | NO  | NO  | upstream   |
| Spy_sRNA_764140- | - | 764140 | 27   | 1           | 1           | YES | NO  | IGR        |
| Spy_sRNA_773110+ | + | 773110 | 21   | 1           | 1           | YES | NO  | upstream   |
| Spy_sRNA_775776+ | + | 775776 | 13   | 0.866666667 | 0.866666667 | YES | NO  | upstream   |
| Spy_sRNA_779816+ | + | 779816 | 123  | 0.611940299 | 0.9609375   | YES | YES | IGR        |
| Spy_sRNA_779831- | - | 779831 | 13   | 1           | 0.65        | NO  | NO  | upstream   |
| Spy_sRNA_779886- | - | 779886 | 26   | 0.962962963 | 0.962962963 | YES | NO  | IGR        |
| Spy_sRNA_780010- | - | 780010 | 198  | 0.994974874 | 0.99        | YES | YES | downstream |
| Spy_sRNA_781630- | - | 781630 | 34   | 0.693877551 | 0.693877551 | YES | NO  | upstream   |
| Spy_sRNA_783335- | - | 783335 | 30   | 0.9375      | 0.9375      | YES | YES | upstream   |
| Spy_sRNA_792465- | - | 792465 | 20   | 1           | 1           | YES | YES | IGR        |
| Spy_sRNA_800113+ | + | 800113 | 48   | 0.979591837 | 1           | YES | NO  | upstream   |
| Spy_sRNA_800319+ | + | 800319 | 19   | 0.863636364 | 0.633333333 | NO  | YES | downstream |
| Spy_sRNA_800369- | - | 800369 | 206  | 0.958139535 | 0.953703704 | YES | YES | IGR        |
| Spy_sRNA_821179+ | + | 821179 | 13   | 0.65        | 0.764705882 | NO  | NO  | upstream   |
| Spy_sRNA_825891- | - | 825891 | 18   | 0.947368421 | 1           | YES | NO  | upstream   |
| Spy_sRNA_825970+ | + | 825970 | 11   | 0.5         | 0.523809524 | YES | YES | IGR        |
| Spy_sRNA_834540+ | + | 834540 | 12   | 0.923076923 | 1           | YES | YES | upstream   |
| Spy_sRNA_846830- | - | 846830 | 13   | 1           | 1           | YES | NO  | upstream   |
| Spy_sRNA_848756+ | + | 848756 | 14   | 1           | 0.933333333 | NO  | NO  | upstream   |
| Spy_sRNA_854464- | - | 854464 | 184  | 0.989247312 | 0.924623116 | YES | YES | IGR        |
| Spy_sRNA_854545- | - | 854545 | 19   | 0.558823529 | 0.95        | YES | YES | IGR        |
| Spy_sRNA_860730+ | + | 860730 | 105  | 1           | 1           | YES | NO  | downstream |
| Spy_sRNA_860871+ | + | 860871 | 238  | 0.987551867 | 0.944444444 | NO  | NO  | IGR        |
| Spy_sRNA_860937+ | + | 860937 | 24   | 1           | 0.75        | NO  | NO  | IGR        |
| Spy_sRNA_861003+ | + | 861003 | 25   | 0.961538462 | 0.625       | NO  | NO  | IGR        |
| Spy_sRNA_861045+ | + | 861045 | 14   | 0.933333333 | 0.736842105 | NO  | NO  | IGR        |
| Spy_sRNA_861069+ | + | 861069 | 253  | 0.996062992 | 0.92        | NO  | NO  | IGR        |
| Spy_sRNA_861135+ | + | 861135 | 282  | 0.992957746 | 0.992957746 | NO  | NO  | IGR        |
| Spy_sRNA_861201+ | + | 861201 | 209  | 0.995238095 | 0.981220657 | NO  | NO  | IGR        |
| Spy_sRNA_878614+ | + | 878614 | 155  | 0.981012658 | 0.956790123 | YES | NO  | upstream   |
| Spy_sRNA_882398+ | + | 882398 | 72   | 0.9         | 0.911392405 | YES | YES | IGR        |
| Spy_sRNA_883534+ | + | 883534 | 60   | 0.952380952 | 0.779220779 | NO  | YES | downstream |
| Spy_sRNA_896408- | - | 896408 | 11   | 1           | 1           | YES | NO  | upstream   |
| Spy_sRNA_896698+ | + | 896698 | 130  | 0.992366412 | 0.992366412 | YES | NO  | upstream   |
| Spy_sRNA_896885- | - | 896885 | 10   | 0.909090909 | 0.909090909 | NO  | NO  | Antisense  |
| Spy_sRNA_921480+ | + | 921480 | 133  | 1           | 1           | YES | NO  | IGR        |
| Spy_sRNA_924338- | - | 924338 | 28   | 0.965517241 | 1           | NO  | NO  | Antisense  |
| Spy_sRNA_930739+ | + | 930739 | 12   | 1           | 1           | YES | NO  | IGR        |
| Spy_sRNA_930742+ | + | 930742 | 12   | 1           | 0.5         | YES | NO  | IGR        |
| Spy_sRNA_934144+ | + | 934144 | 10   | 0.555555556 | 1           | YES | NO  | upstream   |
| Spy_sRNA_944235+ | + | 944235 | 37   | 0.973684211 | 1           | YES | NO  | upstream   |
| Spy_sRNA_946822- | - | 946822 | 197  | 1           | 1           | YES | NO  | upstream   |
| Spy_sRNA_946941+ | + | 946941 | 1351 | 0.858322745 | 0.859414758 | YES | NO  | upstream   |
| Spy_sRNA_950946+ | + | 950946 | 13   | 0.764705882 | 0.764705882 | YES | YES | IGR        |
| Spy_sRNA_953896- | - | 953896 | 36   | 1           | 1           | YES | NO  | upstream   |

|                   |   |         |      |             |             |     |     |            |
|-------------------|---|---------|------|-------------|-------------|-----|-----|------------|
| Spy_sRNA_956690+  | + | 956690  | 22   | 0.846153846 | 0.956521739 | YES | NO  | upstream   |
| Spy_sRNA_979619+  | + | 979619  | 66   | 0.970588235 | 1           | NO  | NO  | Antisense  |
| Spy_sRNA_987427+  | + | 987427  | 89   | 0.659259259 | 1           | YES | NO  | upstream   |
| Spy_sRNA_992257-  | - | 992257  | 24   | 0.96        | 0.96        | YES | YES | upstream   |
| Spy_sRNA_995868-  | - | 995868  | 24   | 1           | 0.923076923 | YES | NO  | upstream   |
| Spy_sRNA_996147-  | - | 996147  | 321  | 0.990740741 | 0.99380805  | YES | YES | downstream |
| Spy_sRNA_1016434- | - | 1016434 | 44   | 0.977777778 | 1           | YES | NO  | upstream   |
| Spy_sRNA_1017640+ | + | 1017640 | 339  | 0.971346705 | 0.979768786 | YES | NO  | upstream   |
| Spy_sRNA_1023066- | - | 1023066 | 14   | 1           | 0.583333333 | YES | YES | downstream |
| Spy_sRNA_1032107+ | + | 1032107 | 34   | 0.918918919 | 0.918918919 | NO  | NO  | Antisense  |
| Spy_sRNA_1039491- | - | 1039491 | 10   | 0.833333333 | 0.833333333 | YES | NO  | upstream   |
| Spy_sRNA_1046169- | - | 1046169 | 678  | 0.99122807  | 0.99122807  | YES | NO  | upstream   |
| Spy_sRNA_1046345+ | + | 1046345 | 168  | 1           | 1           | YES | NO  | IGR        |
| Spy_sRNA_1051808+ | + | 1051808 | 18   | 1           | 1           | NO  | NO  | Antisense  |
| Spy_sRNA_1052999- | - | 1052999 | 14   | 0.636363636 | 0.736842105 | YES | NO  | upstream   |
| Spy_sRNA_1053443- | - | 1053443 | 94   | 0.979166667 | 0.979166667 | YES | NO  | upstream   |
| Spy_sRNA_1055518- | - | 1055518 | 54   | 0.981818182 | 0.981818182 | YES | NO  | IGR        |
| Spy_sRNA_1056178- | - | 1056178 | 15   | 0.714285714 | 0.75        | YES | NO  | upstream   |
| Spy_sRNA_1058985- | - | 1058985 | 60   | 1           | 1           | YES | NO  | upstream   |
| Spy_sRNA_1062296+ | + | 1062296 | 443  | 0.969365427 | 1           | NO  | NO  | upstream   |
| Spy_sRNA_1063616- | - | 1063616 | 154  | 1           | 1           | NO  | NO  | Antisense  |
| Spy_sRNA_1065004+ | + | 1065004 | 54   | 0.981818182 | 0.981818182 | YES | NO  | upstream   |
| Spy_sRNA_1065030+ | + | 1065030 | 378  | 0.984375    | 0.857142857 | NO  | NO  | IGR        |
| Spy_sRNA_1071698+ | + | 1071698 | 18   | 1           | 1           | YES | NO  | upstream   |
| Spy_sRNA_1093241- | - | 1093241 | 13   | 1           | 1           | YES | NO  | upstream   |
| Spy_sRNA_1093376+ | + | 1093376 | 1908 | 0.975959079 | 0.987066736 | YES | NO  | upstream   |
| Spy_sRNA_1106573- | - | 1106573 | 13   | 0.928571429 | 0.928571429 | YES | YES | IGR        |
| Spy_sRNA_1109453- | - | 1109453 | 10   | 1           | 0.666666667 | NO  | YES | IGR        |
| Spy_sRNA_1110925- | - | 1110925 | 60   | 0.952380952 | 1           | YES | YES | IGR        |
| Spy_sRNA_1116927- | - | 1116927 | 12   | 1           | 1           | YES | NO  | upstream   |
| Spy_sRNA_1122674- | - | 1122674 | 21   | 0.954545455 | 0.954545455 | YES | YES | upstream   |
| Spy_sRNA_1125188- | - | 1125188 | 34   | 1           | 1           | YES | NO  | upstream   |
| Spy_sRNA_1126903- | - | 1126903 | 34   | 1           | 1           | YES | NO  | IGR        |
| Spy_sRNA_1137587- | - | 1137587 | 42   | 0.954545455 | 0.857142857 | YES | NO  | upstream   |
| Spy_sRNA_1139116- | - | 1139116 | 278  | 1           | 1           | YES | NO  | upstream   |
| Spy_sRNA_1141334- | - | 1141334 | 20   | 1           | 0.909090909 | YES | NO  | IGR        |
| Spy_sRNA_1153040- | - | 1153040 | 44   | 1           | 1           | YES | NO  | downstream |
| Spy_sRNA_1154171- | - | 1154171 | 15   | 0.882352941 | 0.833333333 | YES | NO  | upstream   |
| Spy_sRNA_1156231- | - | 1156231 | 10   | 1           | 1           | YES | NO  | IGR        |
| Spy_sRNA_1165579- | - | 1165579 | 4209 | 0.995977283 | 0.995741661 | YES | NO  | upstream   |
| Spy_sRNA_1178332- | - | 1178332 | 19   | 0.791666667 | 0.863636364 | YES | NO  | upstream   |
| Spy_sRNA_1181051- | - | 1181051 | 11   | 1           | 1           | YES | NO  | upstream   |
| Spy_sRNA_1185490- | - | 1185490 | 87   | 0.988636364 | 0.988636364 | YES | NO  | upstream   |
| Spy_sRNA_1186876- | - | 1186876 | 14   | 1           | 0.875       | YES | NO  | downstream |
| Spy_sRNA_1188825- | - | 1188825 | 32   | 0.96969697  | 0.96969697  | YES | NO  | upstream   |
| Spy_sRNA_1189708+ | + | 1189708 | 16   | 0.941176471 | 1           | YES | YES | upstream   |
| Spy_sRNA_1212757+ | + | 1212757 | 31   | 0.96875     | 0.96875     | YES | YES | IGR        |
| Spy_sRNA_1221370- | - | 1221370 | 18   | 0.620689655 | 0.642857143 | YES | YES | IGR        |
| Spy_sRNA_1222613- | - | 1222613 | 76   | 0.938271605 | 0.737864078 | NO  | NO  | downstream |
| Spy_sRNA_1222954- | - | 1222954 | 156  | 0.981132075 | 0.987341772 | YES | NO  | upstream   |
| Spy_sRNA_1226446- | - | 1226446 | 20   | 0.571428571 | 0.869565217 | NO  | NO  | upstream   |
| Spy_sRNA_1232004- | - | 1232004 | 14   | 1           | 1           | YES | NO  | upstream   |
| Spy_sRNA_1232985- | - | 1232985 | 15   | 1           | 1           | YES | NO  | upstream   |
| Spy_sRNA_1238404- | - | 1238404 | 67   | 0.917808219 | 0.985294118 | YES | NO  | upstream   |
| Spy_sRNA_1238613+ | + | 1238613 | 12   | 0.923076923 | 0.923076923 | NO  | NO  | IGR        |
| Spy_sRNA_1251166- | - | 1251166 | 30   | 0.967741935 | 0.967741935 | YES | YES | IGR        |
| Spy_sRNA_1254928- | - | 1254928 | 68   | 0.894736842 | 0.985507246 | YES | NO  | upstream   |
| Spy_sRNA_1257527- | - | 1257527 | 11   | 1           | 1           | YES | NO  | upstream   |
| Spy_sRNA_1260092- | - | 1260092 | 197  | 0.933649289 | 0.938095238 | YES | NO  | IGR        |

|                   |   |         |      |             |             |     |     |            |
|-------------------|---|---------|------|-------------|-------------|-----|-----|------------|
| Spy_sRNA_1267683- | - | 1267683 | 21   | 1           | 1           | YES | NO  | IGR        |
| Spy_sRNA_1275654- | - | 1275654 | 24   | 1           | 1           | YES | NO  | upstream   |
| Spy_sRNA_1275740+ | + | 1275740 | 85   | 1           | 1           | YES | NO  | upstream   |
| Spy_sRNA_1280820- | - | 1280820 | 448  | 0.584856397 | 0.589473684 | YES | YES | downstream |
| Spy_sRNA_1290161+ | + | 1290161 | 13   | 1           | 1           | NO  | YES | Antisense  |
| Spy_sRNA_1295825- | - | 1295825 | 62   | 0.96875     | 0.984126984 | YES | YES | downstream |
| Spy_sRNA_1296703+ | + | 1296703 | 176  | 0.972375691 | 1           | YES | YES | upstream   |
| Spy_sRNA_1296706+ | + | 1296706 | 1759 | 0.995472552 | 0.906701031 | YES | YES | IGR        |
| Spy_sRNA_1301352- | - | 1301352 | 28   | 0.933333333 | 0.875       | YES | NO  | upstream   |
| Spy_sRNA_1325671+ | + | 1325671 | 64   | 1           | 0.955223881 | NO  | NO  | Antisense  |
| Spy_sRNA_1328813+ | + | 1328813 | 26   | 1           | 1           | YES | NO  | upstream   |
| Spy_sRNA_1330456- | - | 1330456 | 248  | 0.980237154 | 0.984126984 | NO  | YES | downstream |
| Spy_sRNA_1330659- | - | 1330659 | 128  | 0.992248062 | 0.955223881 | NO  | NO  | upstream   |
| Spy_sRNA_1337660- | - | 1337660 | 173  | 0.723849372 | 0.726890756 | YES | NO  | upstream   |
| Spy_sRNA_1340437+ | + | 1340437 | 28   | 0.736842105 | 0.756756757 | NO  | NO  | upstream   |
| Spy_sRNA_1341945+ | + | 1341945 | 28   | 0.666666667 | 0.651162791 | NO  | NO  | Antisense  |
| Spy_sRNA_1343232- | - | 1343232 | 10   | 1           | 0.909090909 | YES | NO  | upstream   |
| Spy_sRNA_1355857- | - | 1355857 | 37   | 0.973684211 | 0.973684211 | YES | NO  | upstream   |
| Spy_sRNA_1365555- | - | 1365555 | 267  | 0.613793103 | 0.878289474 | NO  | NO  | downstream |
| Spy_sRNA_1365939- | - | 1365939 | 38   | 0.974358974 | 0.775510204 | YES | NO  | IGR        |
| Spy_sRNA_1366822- | - | 1366822 | 11   | 1           | 0.733333333 | NO  | NO  | Antisense  |
| Spy_sRNA_1371249- | - | 1371249 | 14   | 1           | 1           | NO  | NO  | IGR        |
| Spy_sRNA_1375200- | - | 1375200 | 20   | 0.64516129  | 0.952380952 | YES | NO  | upstream   |
| Spy_sRNA_1379849- | - | 1379849 | 17   | 0.80952381  | 0.62962963  | NO  | NO  | downstream |
| Spy_sRNA_1381968+ | + | 1381968 | 23   | 1           | 1           | NO  | YES | Antisense  |
| Spy_sRNA_1389821- | - | 1389821 | 23   | 0.958333333 | 1           | YES | NO  | upstream   |
| Spy_sRNA_1392001- | - | 1392001 | 17   | 1           | 1           | NO  | NO  | upstream   |
| Spy_sRNA_1400292- | - | 1400292 | 36   | 0.9         | 0.734693878 | NO  | YES | downstream |
| Spy_sRNA_1404921- | - | 1404921 | 121  | 0.96031746  | 0.930769231 | YES | YES | downstream |
| Spy_sRNA_1405544- | - | 1405544 | 14   | 1           | 1           | YES | NO  | upstream   |
| Spy_sRNA_1409517- | - | 1409517 | 22   | 0.956521739 | 0.956521739 | YES | YES | upstream   |
| Spy_sRNA_1411615+ | + | 1411615 | 75   | 1           | 0.986842105 | YES | NO  | IGR        |
| Spy_sRNA_1424640- | - | 1424640 | 14   | 1           | 1           | NO  | YES | IGR        |
| Spy_sRNA_1430184- | - | 1430184 | 147  | 0.769633508 | 0.720588235 | YES | YES | IGR        |
| Spy_sRNA_1430359- | - | 1430359 | 31   | 1           | 0.756097561 | YES | YES | upstream   |
| Spy_sRNA_1431858- | - | 1431858 | 46   | 0.541176471 | 0.696969697 | YES | NO  | upstream   |
| Spy_sRNA_1433682+ | + | 1433682 | 13   | 0.866666667 | 0.866666667 | YES | YES | upstream   |
| Spy_sRNA_1439780+ | + | 1439780 | 74   | 0.986666667 | 0.986666667 | YES | NO  | IGR        |
| Spy_sRNA_1442795+ | + | 1442795 | 18   | 0.947368421 | 1           | YES | NO  | upstream   |
| Spy_sRNA_1443306+ | + | 1443306 | 1315 | 0.993202417 | 0.998481397 | YES | NO  | IGR        |
| Spy_sRNA_1443406+ | + | 1443406 | 195  | 0.890410959 | 0.663265306 | NO  | NO  | IGR        |
| Spy_sRNA_1453419- | - | 1453419 | 113  | 0.830882353 | 0.88976378  | YES | YES | downstream |
| Spy_sRNA_1455775- | - | 1455775 | 57   | 0.75        | 1           | YES | NO  | IGR        |
| Spy_sRNA_1461003- | - | 1461003 | 35   | 0.972222222 | 0.972222222 | NO  | NO  | IGR        |
| Spy_sRNA_1467463- | - | 1467463 | 32   | 1           | 1           | YES | NO  | IGR        |
| Spy_sRNA_1471286- | - | 1471286 | 72   | 0.947368421 | 0.96        | YES | NO  | upstream   |
| Spy_sRNA_1471625- | - | 1471625 | 15   | 0.6         | 0.833333333 | NO  | YES | Antisense  |
| Spy_sRNA_1473492- | - | 1473492 | 17   | 1           | 1           | YES | NO  | upstream   |
| Spy_sRNA_1476508- | - | 1476508 | 11   | 1           | 1           | YES | NO  | upstream   |
| Spy_sRNA_1494888- | - | 1494888 | 28   | 1           | 0.965517241 | YES | NO  | upstream   |
| Spy_sRNA_1499056- | - | 1499056 | 30   | 0.666666667 | 1           | YES | NO  | upstream   |
| Spy_sRNA_1516735+ | + | 1516735 | 37   | 1           | 1           | YES | NO  | IGR        |
| Spy_sRNA_1519971- | - | 1519971 | 77   | 0.6875      | 1           | YES | NO  | IGR        |
| Spy_sRNA_1520537+ | + | 1520537 | 12   | 1           | 1           | YES | NO  | upstream   |
| Spy_sRNA_1522747- | - | 1522747 | 32   | 1           | 1           | YES | NO  | upstream   |
| Spy_sRNA_1526660- | - | 1526660 | 12   | 1           | 1           | YES | NO  | upstream   |
| Spy_sRNA_1530865+ | + | 1530865 | 16   | 1           | 0.941176471 | YES | NO  | upstream   |
| Spy_sRNA_1532594- | - | 1532594 | 10   | 0.909090909 | 0.909090909 | YES | NO  | upstream   |
| Spy_sRNA_1532746+ | + | 1532746 | 54   | 1           | 1           | YES | NO  | upstream   |

|                   |   |         |      |             |             |     |     |            |
|-------------------|---|---------|------|-------------|-------------|-----|-----|------------|
| Spy_sRNA_1537282+ | + | 1537282 | 337  | 0.994100295 | 0.99704142  | YES | YES | upstream   |
| Spy_sRNA_1541142+ | + | 1541142 | 31   | 1           | 1           | YES | NO  | Antisense  |
| Spy_sRNA_1545203+ | + | 1545203 | 18   | 0.947368421 | 1           | YES | NO  | upstream   |
| Spy_sRNA_1551952+ | + | 1551952 | 13   | 0.684210526 | 0.684210526 | NO  | NO  | IGR        |
| Spy_sRNA_1555636- | - | 1555636 | 24   | 0.96        | 0.923076923 | YES | NO  | upstream   |
| Spy_sRNA_1555761+ | + | 1555761 | 69   | 1           | 1           | YES | NO  | IGR        |
| Spy_sRNA_1559809- | - | 1559809 | 265  | 0.967153285 | 0.977859779 | YES | NO  | upstream   |
| Spy_sRNA_1561898- | - | 1561898 | 96   | 1           | 1           | YES | NO  | upstream   |
| Spy_sRNA_1562939- | - | 1562939 | 136  | 0.99270073  | 0.985507246 | YES | NO  | upstream   |
| Spy_sRNA_1564097- | - | 1564097 | 13   | 0.866666667 | 0.928571429 | NO  | NO  | IGR        |
| Spy_sRNA_1566328- | - | 1566328 | 69   | 0.896103896 | 1           | YES | NO  | upstream   |
| Spy_sRNA_1566698- | - | 1566698 | 6351 | 0.880982106 | 0.979336931 | YES | NO  | IGR        |
| Spy_sRNA_1567948- | - | 1567948 | 22   | 1           | 1           | YES | NO  | upstream   |
| Spy_sRNA_1568211- | - | 1568211 | 245  | 0.960784314 | 0.949612403 | YES | YES | upstream   |
| Spy_sRNA_1571806- | - | 1571806 | 467  | 0.987315011 | 1           | YES | NO  | upstream   |
| Spy_sRNA_1573589+ | + | 1573589 | 10   | 1           | 0.909090909 | YES | NO  | upstream   |
| Spy_sRNA_1584529+ | + | 1584529 | 14   | 1           | 1           | NO  | NO  | Antisense  |
| Spy_sRNA_1605887+ | + | 1605887 | 14   | 1           | 1           | YES | NO  | upstream   |
| Spy_sRNA_1610157- | - | 1610157 | 68   | 0.985507246 | 0.985507246 | NO  | NO  | IGR        |
| Spy_sRNA_1612019- | - | 1612019 | 18   | 0.75        | 0.666666667 | YES | NO  | upstream   |
| Spy_sRNA_1614211- | - | 1614211 | 39   | 1           | 0.928571429 | NO  | NO  | upstream   |
| Spy_sRNA_1620465- | - | 1620465 | 301  | 0.986885246 | 0.99339934  | YES | NO  | IGR        |
| Spy_sRNA_1626497+ | + | 1626497 | 30   | 1           | 1           | YES | NO  | upstream   |
| Spy_sRNA_1632799- | - | 1632799 | 26   | 0.8125      | 0.8125      | YES | NO  | upstream   |
| Spy_sRNA_1638003- | - | 1638003 | 29   | 1           | 1           | YES | NO  | upstream   |
| Spy_sRNA_1638588- | - | 1638588 | 35   | 0.673076923 | 0.660377358 | YES | NO  | upstream   |
| Spy_sRNA_1646906- | - | 1646906 | 39   | 0.764705882 | 0.795918367 | YES | NO  | upstream   |
| Spy_sRNA_1651365- | - | 1651365 | 11   | 0.55        | 0.916666667 | YES | NO  | upstream   |
| Spy_sRNA_1652986+ | + | 1652986 | 14   | 1           | 0.823529412 | YES | NO  | upstream   |
| Spy_sRNA_1663522+ | + | 1663522 | 1270 | 0.997643362 | 1           | YES | NO  | IGR        |
| Spy_sRNA_1663725+ | + | 1663725 | 226  | 0.99122807  | 0.64756447  | NO  | NO  | IGR        |
| Spy_sRNA_1666770- | - | 1666770 | 12   | 1           | 1           | NO  | NO  | Antisense  |
| Spy_sRNA_1680620- | - | 1680620 | 37   | 0.902439024 | 0.606557377 | NO  | YES | IGR        |
| Spy_sRNA_1680670- | - | 1680670 | 22   | 1           | 1           | YES | YES | IGR        |
| Spy_sRNA_1683632- | - | 1683632 | 11   | 1           | 1           | YES | NO  | upstream   |
| Spy_sRNA_1685305- | - | 1685305 | 57   | 0.966101695 | 0.93442623  | YES | NO  | IGR        |
| Spy_sRNA_1696212- | - | 1696212 | 31   | 1           | 1           | NO  | NO  | upstream   |
| Spy_sRNA_1696383+ | + | 1696383 | 13   | 1           | 1           | YES | NO  | IGR        |
| Spy_sRNA_1696464- | - | 1696464 | 248  | 0.876325088 | 0.888888889 | NO  | NO  | IGR        |
| Spy_sRNA_1696905- | - | 1696905 | 33   | 0.868421053 | 0.785714286 | NO  | YES | downstream |
| Spy_sRNA_1697906- | - | 1697906 | 32   | 1           | 1           | NO  | NO  | upstream   |
| Spy_sRNA_1702727- | - | 1702727 | 102  | 0.990291262 | 0.990291262 | YES | NO  | upstream   |
| Spy_sRNA_1713593- | - | 1713593 | 87   | 0.97752809  | 0.956043956 | YES | NO  | downstream |
| Spy_sRNA_1716417- | - | 1716417 | 15   | 0.555555556 | 0.517241379 | YES | NO  | upstream   |
| Spy_sRNA_1719908+ | + | 1719908 | 49   | 1           | 1           | YES | NO  | upstream   |
| Spy_sRNA_1721621- | - | 1721621 | 61   | 1           | 1           | NO  | YES | IGR        |
| Spy_sRNA_1727750- | - | 1727750 | 16   | 1           | 1           | YES | NO  | IGR        |
| Spy_sRNA_1728167- | - | 1728167 | 48   | 0.979591837 | 0.979591837 | YES | NO  | IGR        |
| Spy_sRNA_1728672- | - | 1728672 | 56   | 1           | 0.933333333 | YES | YES | upstream   |
| Spy_sRNA_1729044+ | + | 1729044 | 35   | 1           | 1           | YES | NO  | upstream   |
| Spy_sRNA_1746346+ | + | 1746346 | 42   | 0.954545455 | 1           | YES | NO  | IGR        |
| Spy_sRNA_1750524- | - | 1750524 | 39   | 1           | 1           | YES | NO  | IGR        |
| Spy_sRNA_1755445- | - | 1755445 | 2101 | 0.99197356  | 0.992911153 | YES | YES | IGR        |
| Spy_sRNA_1762559- | - | 1762559 | 25   | 0.961538462 | 1           | YES | NO  | upstream   |
| Spy_sRNA_1764396- | - | 1764396 | 29   | 1           | 0.966666667 | YES | NO  | IGR        |
| Spy_sRNA_1765647- | - | 1765647 | 29   | 0.878787879 | 1           | YES | NO  | upstream   |
| Spy_sRNA_1766154- | - | 1766154 | 13   | 1           | 1           | YES | NO  | upstream   |
| Spy_sRNA_1767633- | - | 1767633 | 18   | 0.9         | 1           | YES | NO  | downstream |
| Spy_sRNA_1775122- | - | 1775122 | 15   | 1           | 0.9375      | YES | YES | IGR        |

|                   |   |         |      |             |             |     |     |           |
|-------------------|---|---------|------|-------------|-------------|-----|-----|-----------|
| Spy_sRNA_1778807- | - | 1778807 | 182  | 0.892156863 | 0.896551724 | YES | NO  | IGR       |
| Spy_sRNA_1786666+ | + | 1786666 | 148  | 0.826815642 | 0.826815642 | YES | YES | IGR       |
| Spy_sRNA_1790614+ | + | 1790614 | 637  | 0.871409029 | 0.9953125   | YES | NO  | upstream  |
| Spy_sRNA_1797333- | - | 1797333 | 27   | 0.964285714 | 0.931034483 | YES | NO  | IGR       |
| Spy_sRNA_1799042+ | + | 1799042 | 306  | 0.996742671 | 0.971428571 | YES | NO  | IGR       |
| Spy_sRNA_1811977- | - | 1811977 | 61   | 0.910447761 | 0.924242424 | YES | NO  | IGR       |
| Spy_sRNA_1820593- | - | 1820593 | 447  | 0.995545657 | 0.986754967 | YES | YES | IGR       |
| Spy_sRNA_1822599+ | + | 1822599 | 24   | 1           | 1           | YES | NO  | upstream  |
| Spy_sRNA_1829634- | - | 1829634 | 47   | 1           | 1           | YES | NO  | upstream  |
| Spy_sRNA_1840712- | - | 1840712 | 41   | 1           | 0.976190476 | NO  | NO  | IGR       |
| Spy_sRNA_1842269- | - | 1842269 | 36   | 0.818181818 | 0.818181818 | YES | NO  | IGR       |
| Spy_sRNA_1848235- | - | 1848235 | 121  | 0.991803279 | 0.870503597 | NO  | YES | upstream  |
| Spy_sRNA_1848336- | - | 1848336 | 157  | 0.73364486  | 0.726851852 | YES | YES | upstream  |
| Spy_sRNA_1849261+ | + | 1849261 | 1263 | 0.967816092 | 0.975289575 | YES | YES | Antisense |
| Spy_sRNA_1849426+ | + | 1849426 | 203  | 0.975961538 | 0.980676329 | YES | YES | upstream  |
| Spy_sRNA_1850309+ | + | 1850309 | 21   | 0.583333333 | 0.875       | YES | NO  | upstream  |

**Table S1. Novel putative regulatory RNAs identified by bioinformatics analysis of the sRNA sequencing data**

For each identified putative sRNA, the identifier, direction and 5' coordinates are indicated. The 5' sum corresponds to the number of reads with a 5' end at this position. The sliding window ratio corresponds to the ratio of 5' ends of reads that start at that position including all 5' ends of reads in a window of 11 nt. The 5' ratio corresponds to the ratio 5' end\_sum with all reads at that position. A predicted promoter element is defined when located at most 10 nt upstream of the location. A predicted Rho-independent terminator is defined when located at most 300 nt downstream of the location. The filtering parameter used here are  $F_{end} > 10$ ,  $F_{endratio} > 0.5$  and  $5' \text{ end\_local} > 0.5$ . We also removed rRNAs, tRNAs and all sRNAs located in CDSs from the list of putative sRNAs shown here. The location of sRNAs (see column "Type") is indicated as follows: upstream, within the 5' UTR of a gene; downstream, within the 3' UTR of a gene; IGR, intergenic region; CDS: coding sequence; antisense, antisense to a coding sequence. sRNAs that were also found in the visual inspection of the genome using the Integrative Genomics Viewer (IGV) software are highlighted in grey.









**Table S3: List of Strains, Plasmids and Oligos used in this study**

| <b>Strain</b>                                              | <b>Relevant characteristics</b>                                        | <b>Source</b>      |
|------------------------------------------------------------|------------------------------------------------------------------------|--------------------|
| <b><u>Streptococcus pyogenes</u></b>                       |                                                                        |                    |
| <b>WT</b>                                                  |                                                                        |                    |
| EC904                                                      | SF370 (M1 serotype) (WT)                                               | ATCC 700294        |
| <b><u>Δrnc</u></b>                                         |                                                                        |                    |
| EC1636                                                     | EC904Δrnc                                                              | 21                 |
| <b><u>Δrny</u></b>                                         |                                                                        |                    |
| EC2058                                                     | EC904Δrny                                                              | this study         |
| <b><u>ΔciaR</u></b>                                        |                                                                        |                    |
| EC1732                                                     | EC904ΔciaR                                                             | this study         |
| <b><u>E. coli</u></b>                                      |                                                                        |                    |
| RDN204                                                     | TOP10, Host for cloning                                                | Invitrogen         |
| <b>Plasmids</b>                                            |                                                                        |                    |
| <b>Plasmids</b>                                            | <b>Relevant characteristics</b>                                        | <b>Source</b>      |
| <b><u>Vectors for S. pyogenes</u></b>                      |                                                                        |                    |
| pEC85                                                      | repDEG-pAMβ1, pJH1-aphIII, ColE1                                       | Bernhard Roppenser |
| pEC214                                                     | pWV01-repA <sub>ts</sub> , pJH1-aphIII, P <sub>clpB</sub> -βgal, ColE1 | Lab collection     |
| pEC454                                                     | pUC19Ωlox66-erm-lox71                                                  | Lab collection     |
| pEC455                                                     | pEC85ΩP <sub>gyrA</sub> -cre recombinase                               | Lab collection     |
| <b><u>Plasmids used for the overexpression of CiaR</u></b> |                                                                        |                    |
| pET21                                                      | f1, pBR322                                                             | Novagen            |
| pEC1455                                                    | pET21ΩciaR                                                             | This study         |
| <b><u>Plasmids used for the construction of ΔciaR</u></b>  |                                                                        |                    |
| pEC277                                                     | pEC214ΩciaR <sub>koup</sub> -ciaR <sub>kodw</sub>                      | This study         |

| Purpose                                                         | Primer code | Sequence 5'-3' <sup>a</sup>     | F/R <sup>b</sup> | Usage <sup>c</sup> |
|-----------------------------------------------------------------|-------------|---------------------------------|------------------|--------------------|
| <b>Primers used for Northern blots of putative sRNAs</b>        |             |                                 |                  |                    |
| Spy_sRNA93359                                                   | OLEC1023    | CTGACTTTATCAGTGTGATTTAACTGCTGT  | R                | NB                 |
| Spy_sRNA195261                                                  | OLEC1024    | GAAGATAGGTGCCAGGAGATTTATGAAAA   | R                | NB                 |
| Spy_sRNA318404                                                  | OLEC1026    | CTCAGCAAACAATGTGGTTGATGGTGACTC  | R                | NB                 |
| Spy_sRNA542268                                                  | OLEC3160    | CTGAGCTACGCCCCCTCTGFCCTTGTCT    | R                | NB                 |
| Spy_sRNA544833                                                  | OLEC3161    | AGTTTGATCGTAGTTAAAGTTGGCGACTAA  | R                | NB                 |
| Spy_sRNA694150                                                  | OLEC3162    | TAAACTTGCTTCAACACCAGTGTTTTATAA  | R                | NB                 |
| Spy_sRNA779816                                                  | OLEC1033    | CGAGGCAAATCTAGTATAGTAAAAACCTGC  | R                | NB                 |
| Spy_sRNA1110925                                                 | OLEC1036    | GCAAGTCCATCAAAGTTCTACTAAATAATA  | R                | NB                 |
| Spy_sRNA1126903                                                 | OLEC1037    | GTTCCCAAATGAAGTCAACAACGCTCTCAA  | R                | NB                 |
| Spy_sRNA1186876                                                 | OLEC1039    | GCTAAACCAATGATCATAAATAGTAAACATA | R                | NB                 |
| Spy_sRNA1212757                                                 | OLEC3163    | AAAAAGCCAGCTCACAGCTGACTCCTTAGT  | R                | NB                 |
| Spy_sRNA1222613                                                 | OLEC3164    | AAAGCCCACTGCACAGGCTACACGCTTGT   | R                | NB                 |
| Spy_sRNA1260092                                                 | OLEC1040    | GACCTAATCCTATTGACAAATAACGGAATA  | R                | NB                 |
| Spy_sRNA1300419                                                 | OLEC3165    | TTTCTCATTAAAGCTTTTATAGACGAAATA  | R                | NB                 |
| Spy_sRNA1571135                                                 | OLEC1041    | GAGAGCTTTTGCTGACTCATAAAGAGGT    | R                | NB                 |
| Spy_sRNA1721621                                                 | OLEC1043    | GATAGCATTAGTTAAGACGATACTTCTAC   | R                | NB                 |
| Spy_sRNA1755445                                                 | OLEC1044    | GAGTTTCCCAATATCAACTGTGTTATTGT   | R                | NB                 |
| Spy_sRNA1774740                                                 | OLEC3166    | AAGTTTCCACGCTCGCAAGGCTTAAAAA    | R                | NB                 |
| Spy_sRNA1775122                                                 | OLEC3167    | ACCGTCCCACACTTTAGCCAACTGTTGACG  | R                | NB                 |
| Spy_sRNA1786666                                                 | OLEC3168    | TTACACAATGAGTTCAGCAGGCAAGAACTA  | R                | NB                 |
| <b>Primers used for Northern blots of putative asRNAs</b>       |             |                                 |                  |                    |
| Spy_sRNA392987                                                  | OLEC3145    | AATCCTGTATAGTAGAGTTGCGACACTTAC  | R                | NB                 |
| Spy_sRNA477741                                                  | OLEC3146    | CCTTTAACCTGGTGATGACATCGCTAGGT   | R                | NB                 |
| Spy_sRNA480642                                                  | OLEC4058    | TTGATCTCTTACTGACAAGACACTCACTTT  | R                | NB                 |
| Spy_sRNA480696                                                  | OLEC4057    | AAAGTGAGTGTCTTGTCACTAAGAGATCAA  | R                | NB                 |
| Spy_sRNA531081                                                  | OLEC4893    | TTTTTACTATACTAGATTCCGCTCACGCTC  | R                | NB                 |
| Spy_sRNA532788                                                  | OLEC4056    | CTGTAATAATAGCAGTTTACGGGACAGACAG | R                | NB                 |
| Spy_sRNA728180                                                  | OLEC4064    | CCGTGCGCTTTTAG                  | R                | NB                 |
| Spy_sRNA800369                                                  | OLEC1034    | GAAATAACAATACCCTCTAGCTCTCGGTC   | R                | NB                 |
| Spy_sRNA924338                                                  | OLEC4067    | TGTTCTCCAGCTCTTC                | R                | NB                 |
| Spy_sRNA1032107                                                 | OLEC4069    | GCCGCTTCTAGTCTCCC               | R                | NB                 |
| Spy_sRNA1063616                                                 | OLEC4070    | CTCCCTGATCGCTGG                 | R                | NB                 |
| Spy_sRNA1167444                                                 | OLEC4071    | TGGGCGCCCTTTCTTT                | R                | NB                 |
| Spy_sRNA1221370                                                 | OLEC4060    | AGAGCGTGAGGCGAATCTAGTATAGTAAAA  | R                | NB                 |
| Spy_sRNA1718031                                                 | OLEC4061    | TCCTAGCCTTTGAGTATTATCGTTTTCAT   | R                | NB                 |
| Spy_sRNA1778807                                                 | OLEC4062    | GCGACCAAACCTCCAAGCCTTTAATTAGTA  | R                | NB                 |
| <b>Primers used for Northern blots of known sRNAs</b>           |             |                                 |                  |                    |
| SRP                                                             | OLEC431     | TGTTTCATCACTAACTCCCAT           | F                | NB                 |
|                                                                 | OLEC432     | CCTCTTAGCCTAAATAAAAA            | R                | NB                 |
| tmRNA                                                           | OLEC448     | TTTGGGGTTGTTACGGATTC            | F                | NB                 |
|                                                                 | OLEC449     | AACATATTTGTCTACGTCCA            | R                | NB                 |
| RNase P                                                         | OLEC375     | TAGCTTAACCTATTATGCAA            | F                | NB                 |
|                                                                 | OLEC376     | AGGATGTGCATACACATTA             | R                | NB                 |
| 6S RNA                                                          | OLEC653     | ACATTGCTGTGGCATACGA             | F                | NB                 |
|                                                                 | OLEC654     | TGAGCCCGCCGAGTATAA              | R                | NB                 |
| T-box-tsra                                                      | OLEC468     | AAAAAGTCCCACGCTATTA             | F                | NB                 |
|                                                                 | OLEC469     | TGTACTGAGACCGTCAAGTC            | R                | NB                 |
| yybP-YkoY                                                       | OLEC352     | AGATAGCAGTAAATCATCTGA           | F                | NB                 |
|                                                                 | OLEC353     | GTTGTTCAAATAAAAAAGACC           | R                | NB                 |
| PyrR                                                            | OLEC709     | ATAATAGTTTAAATTTAGACA           | F                | NB                 |
|                                                                 | OLEC710     | CTATAATGTGTCAATATCTCA           | R                | NB                 |
| glycine                                                         | OLEC435     | TTTTTGAGGTATGATAGTCC            | F                | NB                 |
|                                                                 | OLEC436     | ATTTAACGAGTGCTATCATC            | R                | NB                 |
| purine                                                          | OLEC437     | TGATATGGAGTTAGCTAGGA            | F                | NB                 |
|                                                                 | OLEC438     | CAAAGCCAGAACTATAAGA             | R                | NB                 |
| TPP                                                             | OLEC397     | CCATAAGAAGGACTAAACCA            | F                | NB                 |
|                                                                 | OLEC398     | TAAAACCCCTTATCCTTGAC            | R                | NB                 |
| FMN                                                             | OLEC433     | GTCAGTAGCTGACGCTTTTA            | F                | NB                 |
|                                                                 | OLEC434     | GATATCGCAGAAAGTATACC            | R                | NB                 |
| <b>Loading controls for Northern blots</b>                      |             |                                 |                  |                    |
| 5S rRNA                                                         | OLEC288     | CTAAGCGACTACCTTATCTCA           | R                | NB                 |
| <b>Primers used for CiaR overexpression (Cloning in pEC21a)</b> |             |                                 |                  |                    |
| CiaR                                                            | OLEC1471    | GGTGGTCATATGATGATAAAAAATATTATA  | F                | PCR                |

|                                                                            |          |                                                            |   |     |
|----------------------------------------------------------------------------|----------|------------------------------------------------------------|---|-----|
|                                                                            | OLEC1472 | TGATCTCGAGTTCATTGTTTTTAGAATATATCC                          | R | PCR |
| <b>Primers used for amplification of the CiaR-binding promoter regions</b> |          |                                                            |   |     |
| Spy_sRNA195261                                                             | OLEC1574 | GGTTTAGGTAACCCGCTTTTTAGG                                   | F | PCR |
|                                                                            | OLEC1575 | TTTGCGTGGAAACTAGCTCTCTC                                    | R | PCR |
| Spy_sRNA1721621                                                            | OLEC1627 | GGAATGACATTAGTATACTAGATAAG                                 | F | PCR |
|                                                                            | OLEC1628 | TAACCGTTGCTATCACCAGATTCA                                   | R | PCR |
| pepV                                                                       | OLEC1603 | GGACAATTAGTTAAATGTAATGTC                                   | F | PCR |
|                                                                            | OLEC1604 | GGTTGTCATTATACTCTCCTTATTC                                  | R | PCR |
| SP_0570                                                                    | OLEC1607 | GTGACATGATAACTCCTTTATCTA                                   | F | PCR |
|                                                                            | OLEC1608 | TTCTCTGAAAGACAACTATTGTT                                    | R | PCR |
| htrA                                                                       | OLEC1611 | CCTTTGTACAAGGCTTTTATTAG                                    | F | PCR |
|                                                                            | OLEC1612 | GCATGTTTTGTCTCCGAATTATT                                    | R | PCR |
| pepO                                                                       | OLEC1615 | TGATAAGTTGTCATTCTGATCTCC                                   | F | PCR |
|                                                                            | OLEC1616 | CAATTGAGATAAGTTATTTAGCT                                    | R | PCR |
| pcrA                                                                       | OLEC1619 | AAGGATTCATGCTTTCCTTAAAT                                    | F | PCR |
|                                                                            | OLEC1620 | AGGAATCTCTTACTTTTGGGGTTC                                   | R | PCR |
| pbp2A                                                                      | OLEC1623 | CTCATAACGTTATTATACCACTATG                                  | F | PCR |
|                                                                            | OLEC1624 | ATTCAACCGAATTTGCACATCAC                                    | R | PCR |
| negative control                                                           | OLEC1303 | GAAATTAATACGACTCACTATAGGCATCCTAAAAAGCGGTTTACCTAAACCG       | F | PCR |
|                                                                            | OLEC1523 | AAAAACCTAACCCAGCCGTTAACTGG                                 | R | PCR |
| <b>Primers used for construction of pEC455</b>                             |          |                                                            |   |     |
| PgyrA from <i>Streptococcus agalactiae</i>                                 | OLEC1852 | GGTTCGTATGGCTCAGTGGT                                       | F | PCR |
|                                                                            | OLEC1853 | GTTCTCTTTGCTTCCATCGT                                       | R |     |
| cre recombinase from pNZ5348                                               | OLEC1933 | CAGTGAAGAAAAGGGCATTTTTTAAATGGTATCCAATTTACTGACCGTACAC       | F | PCR |
|                                                                            | OLEC1934 | AAAGAGCTCCTAATCGCCATCTTCCAGCAGG                            | R |     |
| <b>Primers used for construction of <math>\Delta rny</math></b>            |          |                                                            |   |     |
| Up fragment                                                                | OLEC1998 | ATGATGATCAATGATTTTTGAAAAAGAGAAAATG                         | F | PCR |
|                                                                            | OLEC1999 | TATAATGTATGCTATACGAACGGTAGTTTGTACCTCAATATATTCTAGATTTCAATTA | R |     |
| Dw fragment                                                                | OLEC2000 | ATAGCATACATTATACGAACGGTAAAAAGAGGAATTATCCTCTTTTCTTTATGA     | F | PCR |
|                                                                            | OLEC2501 | CAAGTGCCTGAAGTGTGACTTC                                     | R |     |
| PCR checking                                                               | OLEC2502 | TAATGAAATCTAGAATATATTGAGGTACAAC                            | F | PCR |
|                                                                            | OLEC2503 | GACAGTTACGTTTAGCTGAAG                                      | R |     |
|                                                                            | OLEC2785 | TCGCAATCGTTGAAAATCAT                                       | F | SEQ |
|                                                                            | OLEC2786 | CGAACGGTAGTTTGTACCTCAA                                     | R | SEQ |
| <b>Primers used for construction of <math>\Delta ciaR</math></b>           |          |                                                            |   |     |
| Up fragment                                                                | OLEC1350 | GGGCTGGGATCCCGCTTGGTTTTAGCCAACCAAATG                       | F | PCR |
|                                                                            | OLEC1351 | ATCTCTTTTTTAATTTGTTTCATGTCTCTACCTCAATTGTTCT                | R |     |
| Dw fragment                                                                | OLEC1352 | AGAACAATTGAGGTAGAGACATGAACAAATTAAGAGAT                     | F | PCR |
|                                                                            | OLEC1353 | TTTGGGAATTCCTTAGCAACTAGTTCATAAATCTC                        | R |     |
| PCR checking                                                               | OLEC1363 | TTATCTTACAGATTATGCGTTTGG                                   | F | SEQ |
|                                                                            | OLEC1364 | CTAGTCATGAATTAAGGACCCC                                     | F | SEQ |

<sup>a</sup> *italic*, sequence annealing to the template; underlined, restriction site;

<sup>b</sup> F, forward primer; R, reverse primer.

<sup>c</sup> NB, probe for Northern blot; SEQ, sequencing.

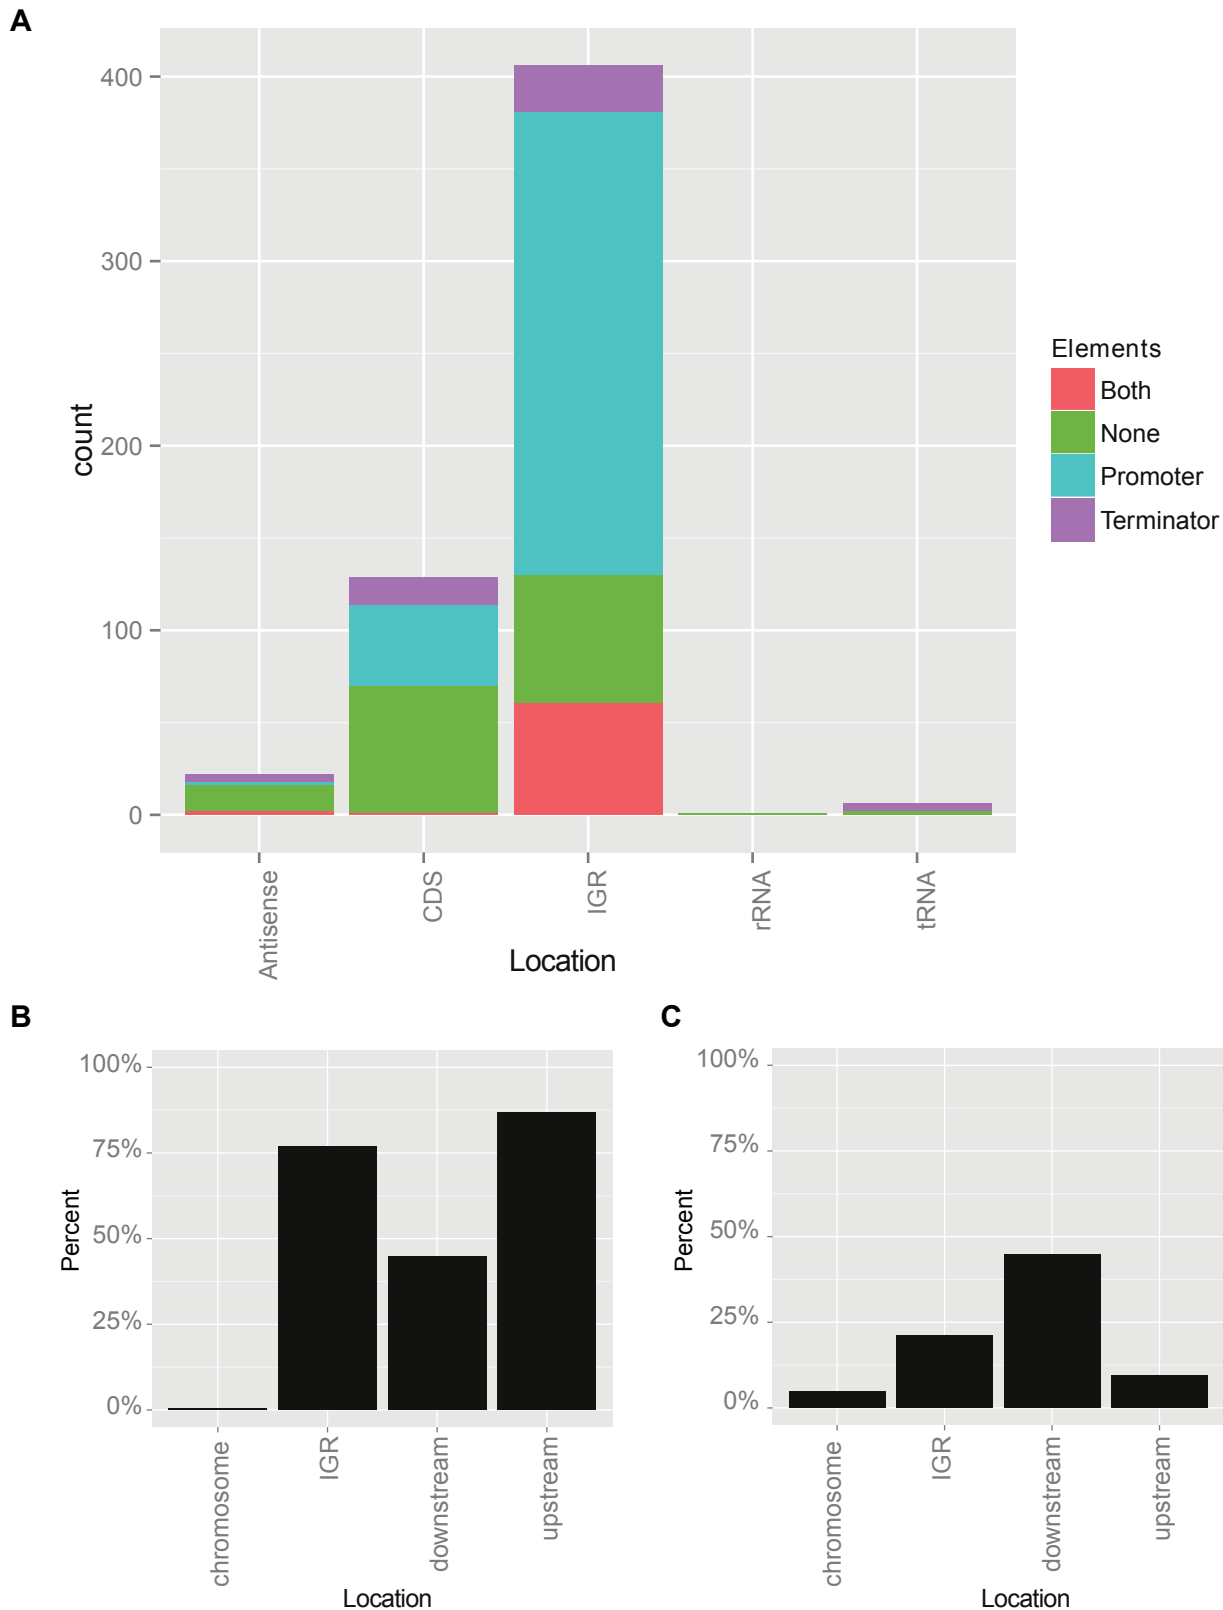

**Figure S1. sRNA categories**

The bars in **A** represent the distribution of reads in the different annotated regions on the genome. Antisense indicates putative sRNAs that are transcribed opposite to the three annotated regions: CDS, rRNA and tRNA. The colors of the bars represent the number of the predicted RNAs that had a promoter upstream (blue), a terminator downstream (purple), both a promoter and a terminator (red), or no promoter and no terminator (green). The bars in **B** represent the percent of sRNAs that had a predicted promoter located right upstream of the sRNA sequence. The bars in **C** represent the percent of sRNAs that had a predicted terminator located downstream of the sRNA sequence. Chromosome shows the percent locations on the chromosome that fit the same criteria. CDS: coding sequence.

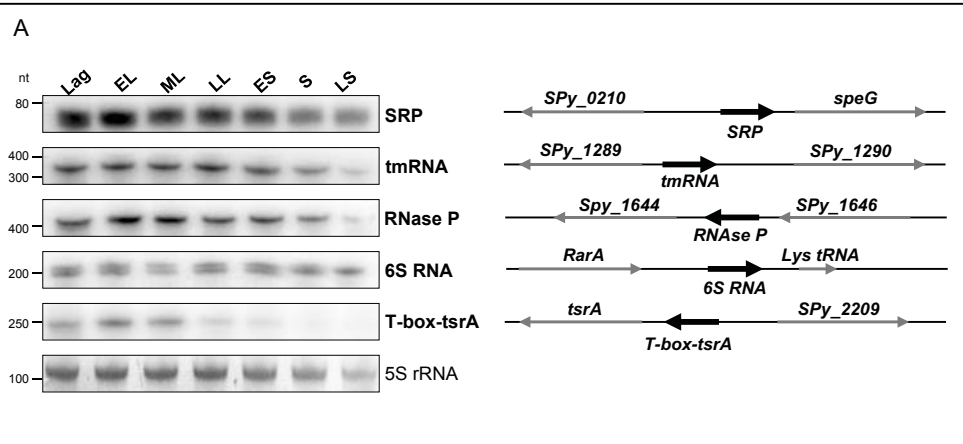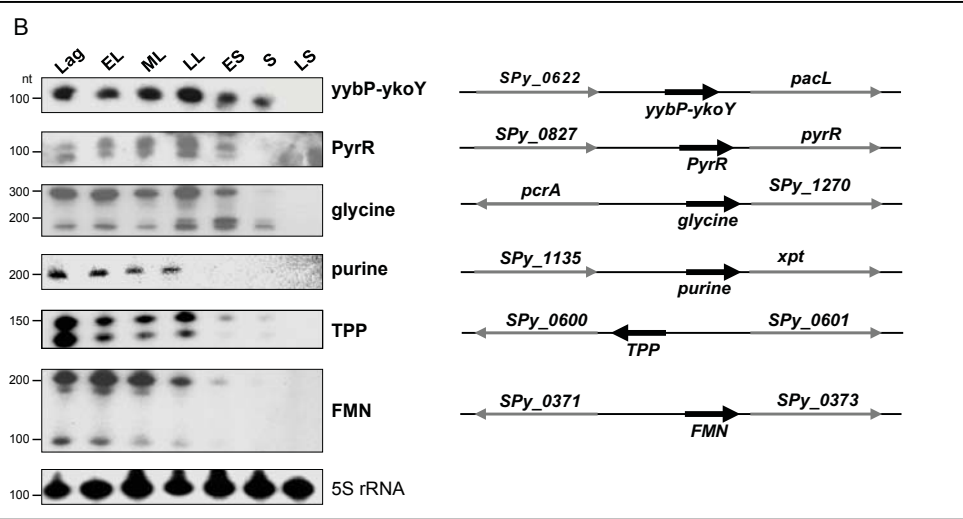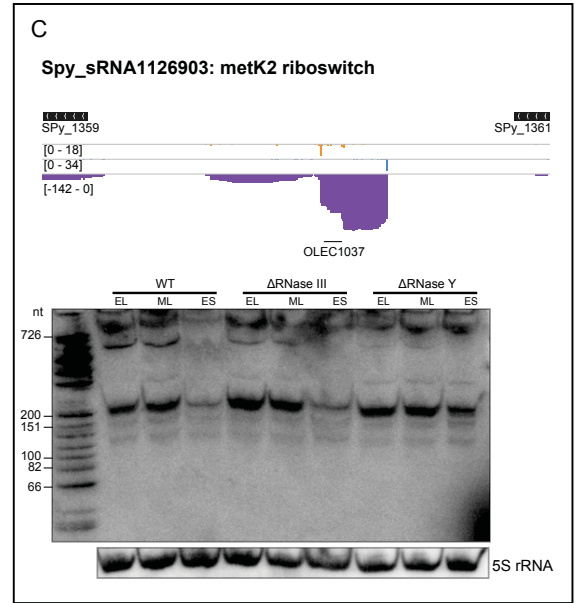

**Figure S2. Previously known sRNAs**  
Northern blot analysis (polyacrylamide gel electrophoresis) of selected known sRNAs in *S. pyogenes* SF370 grown to different time points (L, lag; EL, early logarithmic; ML, mid logarithmic; LL, late logarithmic; ES, early stationary; S, stationary and LS, late stationary). The location of sRNAs on the genome with the surrounding genes upstream and downstream is indicated. **A.** Selected housekeeping sRNAs. **B.** Selected putative riboswitches. **C.** The MetK2 element expression profile was analyzed in WT,  $\Delta$ RNase III ( $\Delta rnc$ ) and  $\Delta$ RNase Y ( $\Delta rny$ ) at EL, ML and ES phases of growth. 5S rRNA was used as a loading control.



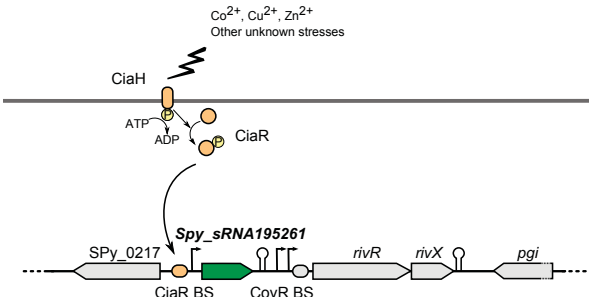

**Phenotypes regulated by CiaRH**  
 Stress response and genetic competence  
 Expression of sugar transport systems  
 Adhesion to and internalization of epithelial cells

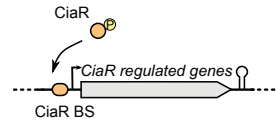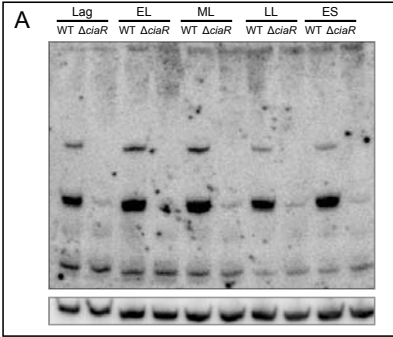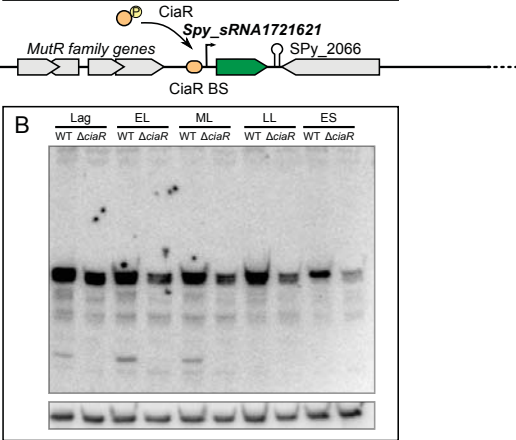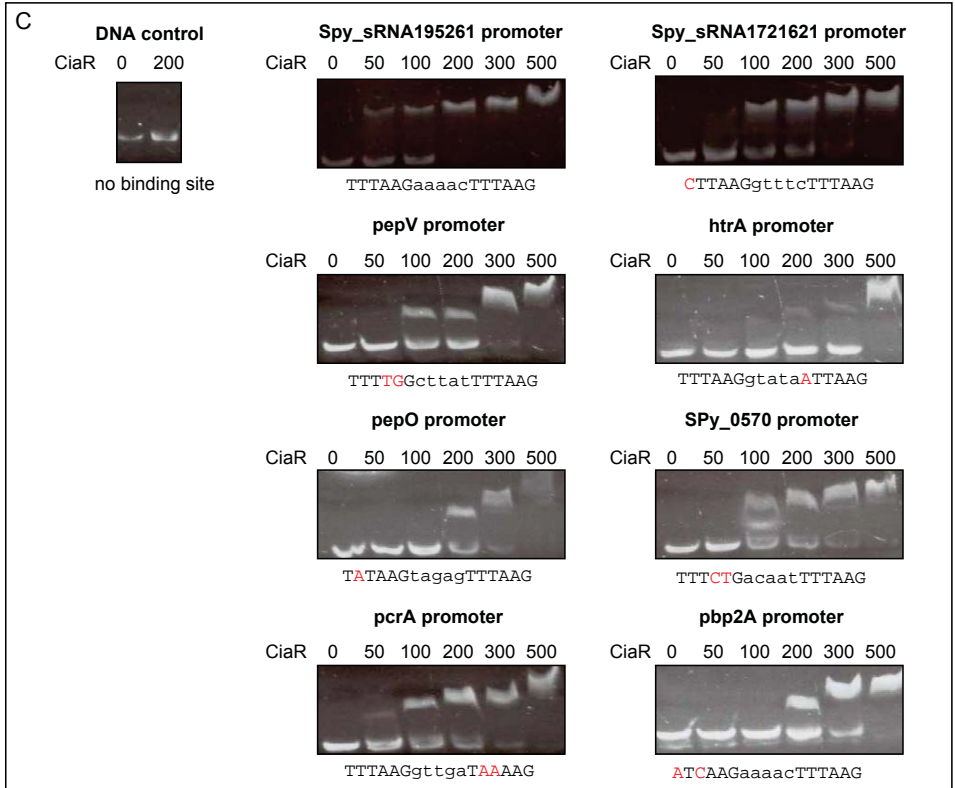

### Figure S3. csRNAs in *S. pyogenes*

The drawing represents the cytosol (lower part) separated from the extracellular environment (upper part) by the cell wall/membrane delineated by a grey line. The two identified csRNAs of *S. pyogenes* SF370 are depicted in green. The two-component system CiaRH is represented in orange. CiaH is the sensor anchored in the membrane and CiaR is a transcriptional regulator binding to a specific DNA sequence that is located upstream of the csRNAs and other genes in the genome. Northern blot analysis (polyacrylamide gel electrophoresis) of **A.** Spy\_sRNA195261 and **B.** Spy\_sRNA1721621 csRNA expression in WT and  $\Delta$ *ciaR* strains grown to different growth phases (lag; EL, early logarithmic; ML, mid logarithmic; LL, late logarithmic and ES, early stationary). 5S rRNA is used as loading control. In the presence of CiaR, csRNA expression is up-regulated at all phases of growth. **C.** Electrophoretic mobility shift assays of various putative CiaR binding promoter regions containing the TTTAAG-N<sub>5</sub>-TTTAAG. Molar ratios of CiaR to promoter fragment are indicated for each lane. No shift was observed with the control DNA that does not contain the consensus sequence. Spy\_sRNA195261 and Spy\_sRNA1721621 promoter fragments (top) are bound by CiaR. Spy\_sRNA195261 promoter contains a perfect CiaR binding motif and shows stronger binding than the Spy\_sRNA1721621 promoter region with a single mismatch to the consensus sequence. Note, that as observed by Northern blot analysis (**A** and **B**), CiaR had a stronger regulatory effect on Spy\_sRNA195261. Promoter regions of genes with degenerated CiaR-binding motifs (bottom) are bound by CiaR with varying affinities suggesting potential regulation of those genes by CiaRH.

### Spy\_sRNA542268

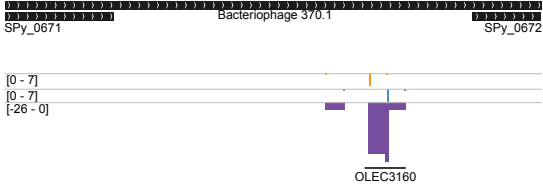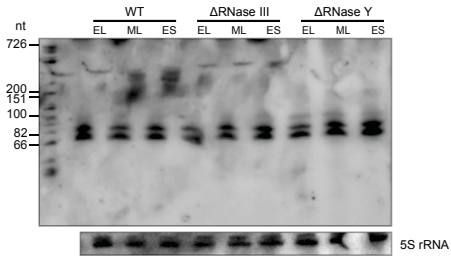

### Spy\_sRNA544833

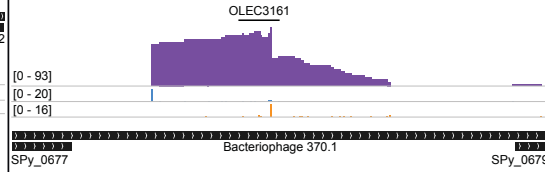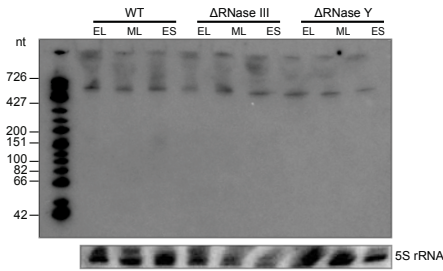

### Spy\_sRNA694150

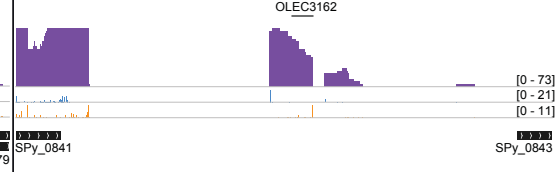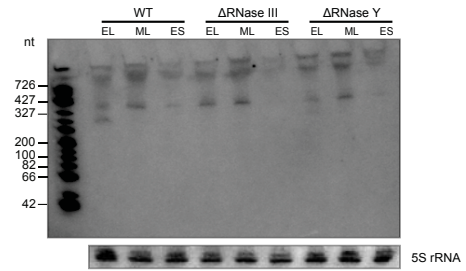

### Spy\_sRNA779816

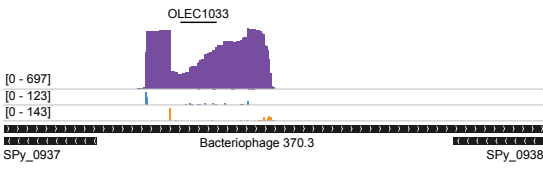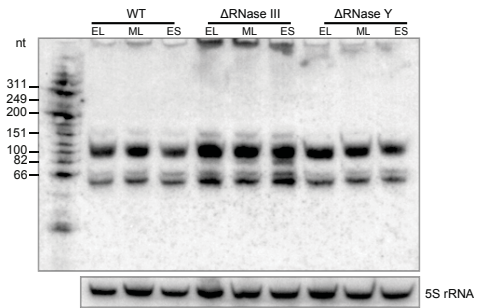

### Spy\_sRNA1110925

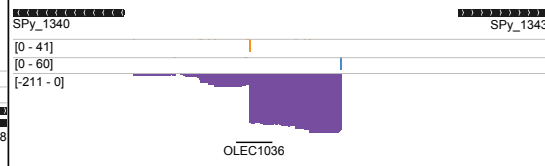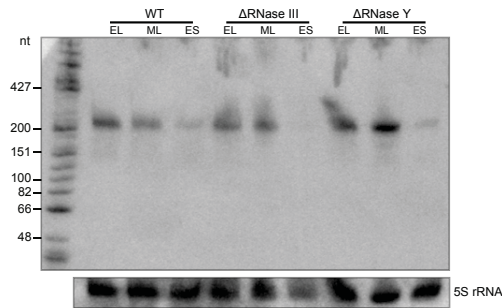

### Spy\_sRNA1186876

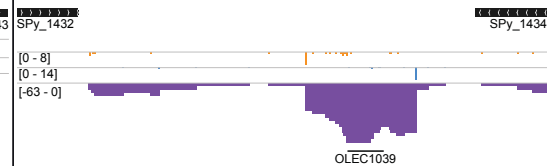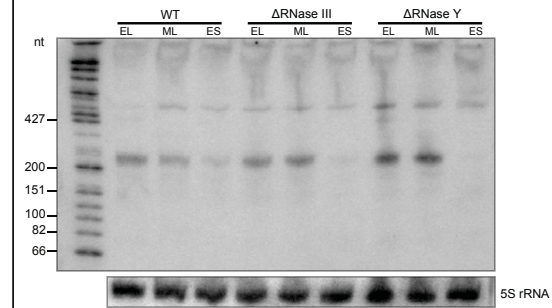

**Spy\_sRNA1212757**

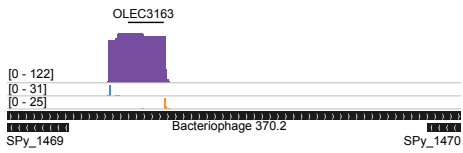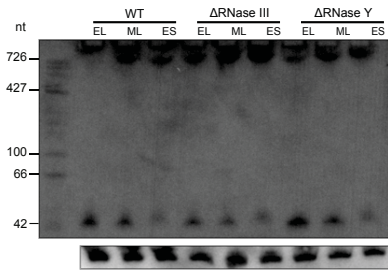

**Spy\_sRNA1222613**

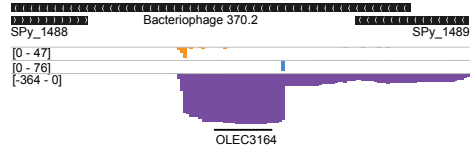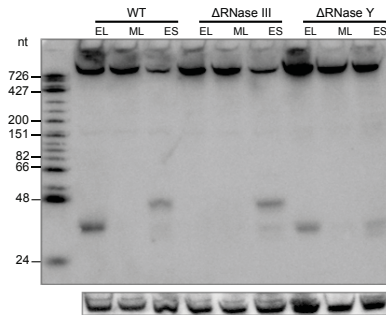

**Spy\_sRNA1260092**

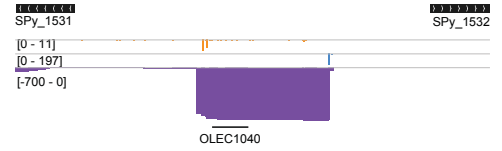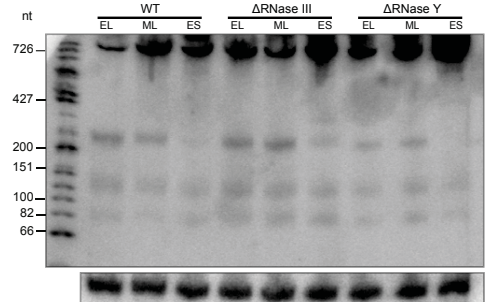

**Spy\_sRNA1300419**

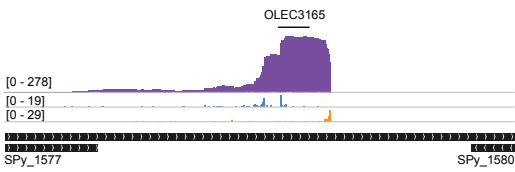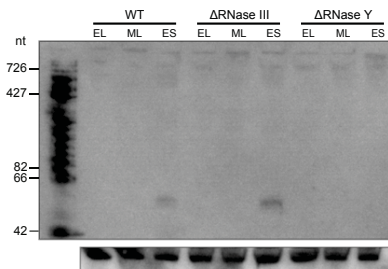

**Spy\_sRNA1571135**

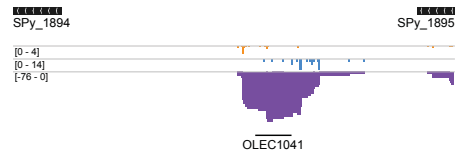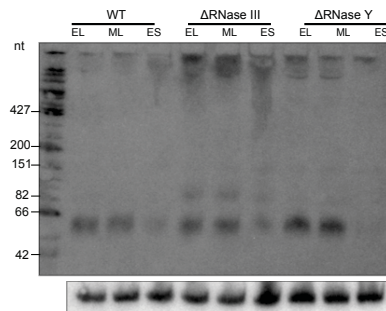

**Spy\_sRNA1755445**

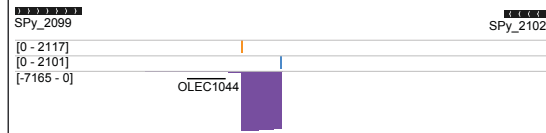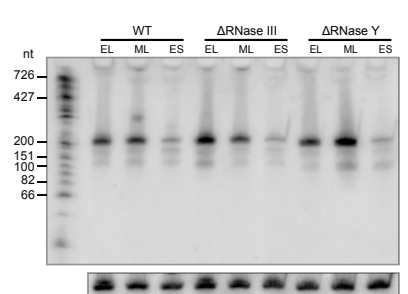

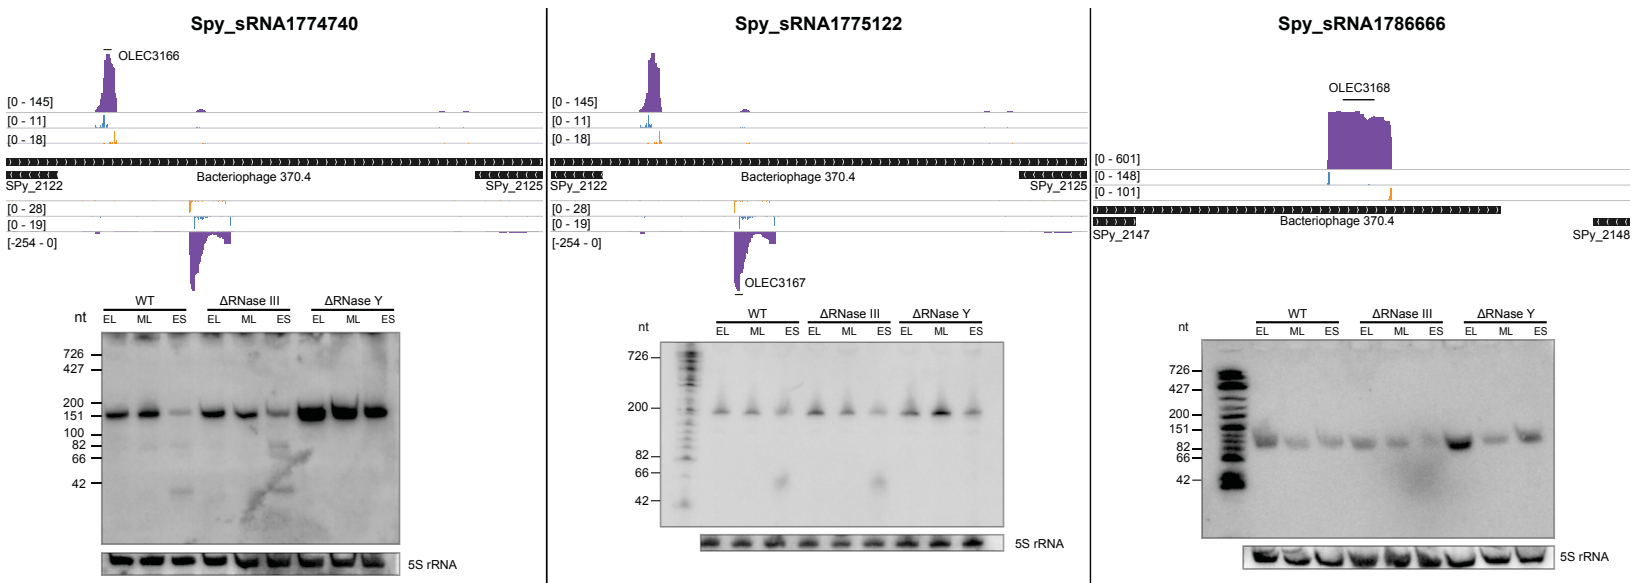

**Figure S4. Expression profiles of experimentally validated sRNAs**

Expression profiles of selected sRNAs and surrounding loci were captured using the Integrative Genomics Viewer (IGV) software. The sequence coverage was calculated using BEDTools-Version-2.15.0 and the scale is given in number of reads per million. The distribution of reads starting (5') and ending (3') at each nucleotide position is indicated in blue and orange, respectively. Transcripts from the positive strand are represented above the locus drawn in black and transcripts from the negative strand are represented below. The positions of the primers used in Northern blot analysis (OLEC) are indicated. Polyacrylamide Northern blot expression profile was analyzed in WT (SF370),  $\Delta$ RNase III ( $\Delta$ *rmc*) and  $\Delta$ RNase Y ( $\Delta$ *ryy*) strains by using total RNA from early logarithmic (EL), mid logarithmic (ML) and early stationary (ES) phases of growth. The approximate size of bands was estimated according to the  $\Phi$ X174 DNA/HinfI marker (Fermentas®). 5S rRNA specific hybridization pattern was used as a reference.

### A Spy\_sRNA779816

Read coverage [0 - 697]

DNA sequence

TTGTGTTTTCTGACCACATTTTTTTTACCTCATTTTTCTGTTAAAAAGTATAGTAAAGAGACCTACGGCAAAGCAGGTTTTACTACTAGATTGCGCTGGCGCTCAGAGTCGCCAAACTTTGAGAGCGTGGGGCTTTTTTAT

Motifs

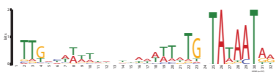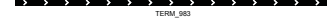

NC\_002737 GUAAGAGACCUACGGCAAAGCAGGUUUUUACUUAUCUAGAUAUUCGCGCUCAGAGUCGCCAAACUUUGAGAGCGUGGGGUUUUUU  
NC\_009332 GUAAGAGACCUAC-UUAAAGCAGGUUUUUACUUAUCUAGAUAUUCGCGCUCAGAGUCGCCAAACUUUGAGAGCGUGGGGUUUUUU  
NC\_011375 GUAAGAGACCUACUGCGAAGCAGGUUUUUACUUAUCUAGAUAUUCGCGCUCAGAGUCGCCAAACUUUGAGAGCGUGGGGUUUUUU  
NC\_015558 GUAAGAGACCUAC--AAAAGGUUCUUUACUUAUCCUUUCUGAUCCAGUCAGAGUCGCCAAACUUUGAGAGCGUGGGGUUUUUU  
\*\*\*\*\*.\*\*\*\*\* \* .\*\*\*\*\* \* \* \* \* .\*\*\*\*\* \* \*\*\*\*\*.\*\*\*\*\* \*\*\*\*\*

### B Spy\_sRNA1186876

Motifs

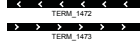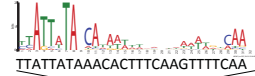

DNA sequence

TTATTATAAACACTTTCAAGTTTTTCAA

Read coverage

[-62789 - 0]

NC\_002737 UAAGACUUUAGAAAGAGAAAACCGCGUAUGUUUACUUAUUAUGAUCAUUGGUUUAGCUGUAUUUUCAAUUAUUAAAAUCAUUCUAUUUUUCUAUUUUUAUCAGCAUUUGAGCGCAAGCAAAAAG  
NC\_009332 UAAGACUUUAGAAAGAGAAAACCGCGUAUGUUUACUUAUUAUGAUCAUUGGUUUAGCUGUAUUUUCAAUUAUUAAAAUCAUUCUAUUUUUCUAUUUUUAUCAGCAUUUGAGCGCAAGCAAAAAG  
NC\_012891 UAAGACUUUAGAAAGAGAAAACCGCGUAUGUUUACUUAUUAUGAUCAUUGGUUUAGCUGUAUUUUCAAUUAUUAAAAUCAUUCUAUUUUUCUAUUUUUAUCAGCAUUUGAGCGCAAGCAAAAAG  
\*\*\*\*\*.\*\*\*\*\* \* .\*\*\*\*\* \* \* \* \* .\*\*\*\*\* \* \*\*\*\*\*.\*\*\*\*\* \*\*\*\*\*

NC\_002737 AAAAGUUGAAUCAACAACAGCAAGAGACAGUCCCAAGAAAGUGACGCGUCGCCJUCAAAAAUUUCCAUUUUAAA--AAGCUUGGAAAGUGUACAAGUGCACAUUUCCAAGCUUUU  
NC\_009332 AAAAGUUGAAUCAACAACAGCAAGAGACAGUCCCAAGAAAGUGACGCGUCGCCJUCAAAAAUUUCCAUUUUAAA--AAGCUUGGAAAGUGUACAAGUGCACAUUUCCAAGCUUUU  
NC\_012891 AAAAGUUGAAUCAACAACAGCAAGAGAGCCCAAGAAAGUGAUGCCGUCGCCJUCAAAAAUUUCCAUUUUAAAAGAGCUUGGAAAGUGUACAAGUACCAACUCCUCCAAGCUUUU  
\*\*\*\*\*.\*\*\*\*\* \* .\*\*\*\*\*.\*\*\*\*\* \* \* \* \* .\*\*\*\*\* \* \*\*\*\*\*.\*\*\*\*\* \*\*\*\*\*

### C Spy\_sRNA1212757

Read coverage [0 - 122]

DNA sequence

TGCTCACTA ACTAGCTCTTTTTTGATATAATAGATTTGTGCA AATTATTA ACTAAGGAGTCA GCTGTGAGCTGGCTTTTTTGTGGAGAAAAGCCCTCTCTTCC

Motifs

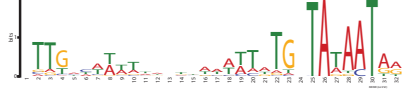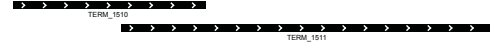

NC\_002737 GUCAAAUAUUAACUAAGGAGUCAGCUGUGAGCUGGCUUUUU  
NC\_009332 GUCAAAUAUUAACUAAGGAGUCAGCUGUGAGCUGGCUUUUU  
NC\_018936 GUCAAAUAUUAACUAAGGAGUCAGCUGUGAGCUGGCUUUUU  
NC\_021807 GUCAAAUAUUAACUAAGGAGUCAGCUGUGAGCUGGCUUUUU  
\*\*\*\*\*.\*\*\*\*\* \* .\*\*\*\*\* \* \* \* \* .\*\*\*\*\* \* \*\*\*\*\*.\*\*\*\*\* \*\*\*\*\*

### D Spy\_sRNA1786666

Read coverage [0 - 601]

DNA sequence

AGGGTAGTTTTTCTCCTCAATGACACTAATCGTGCTATAATAAGCCATAGGGCAAACATAAAGCGTAGTATTTAAAC TAGCTAGTCTTGCCTGCTGAAC TCATTGTGTA AAGGACCTGTA AAGGCTTTTTTTGTTCAC

Motifs

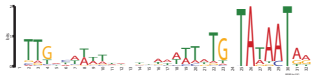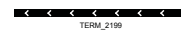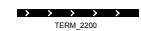

NC\_002737 UAGGGCAAACU-AAAAGCGUAGUAUUUAAACACGCUAGUUCUUGCCUGCUGAACUCAUUGUGUAAAGGACCUGUAAAGGUCUUUUU  
NC\_022532 UAAGGCAAACU-AAAAGCGUAGUAUUUAAACACGCUAGUUCUUGCCUGCUGAACUCAUUGUGUAAAGGACCUGCAAAGGUCUUUUU  
NC\_008022 UAAGGCAAACUAAAAGCGUAGUAUUUAAACACGCUAGUUCUUGCCUGCUGAACUCAUUGUGUAAAGGACCUGUAAAGGUCUUUUU  
\* .\*\*\*\*\* \* \* \* \* .\*\*\*\*\* \* \*\*\*\*\*.\*\*\*\*\* \*\*\*\*\*

### **Figure S5. Expression profiles and sequence conservation of selected sRNAs**

sRNA sequencing expression profiles of four selected sRNAs captured using the Integrative Genomics Viewer (IGV) software. The sequence coverage was calculated using BEDTools-Version-2.15.0 and the scale is given in number of reads per million. For each sRNA, the predicted promoter region (logo obtained by MEME v 4.9.1) and terminator region (using TransTermHP v2.07<sup>83</sup> (downloaded from [http://transterm.cbcb.umd.edu/tt/Streptococcus\\_pyogenes\\_M1\\_GAS.tt](http://transterm.cbcb.umd.edu/tt/Streptococcus_pyogenes_M1_GAS.tt))) are indicated. sRNA homologues from other streptococcal strains were aligned using MAFFT (mafft-ginsi) (v7.220)<sup>82</sup>. See also Figure 2 for Northern blot analyses and sRNA structure predictions.

### 5' UTR Spy\_sRNA392987

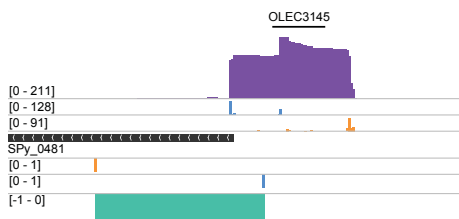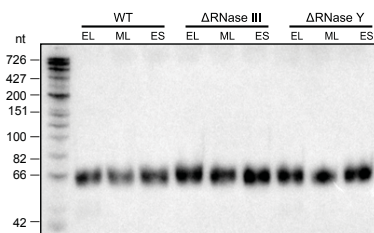

5S rRNA

### 3' UTR Spy\_sRNA477741

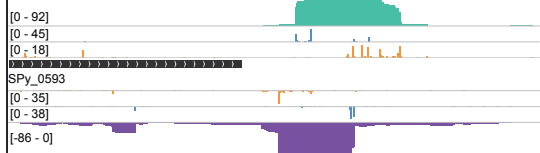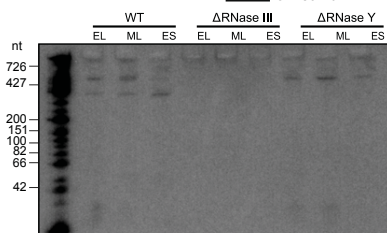

5S rRNA

### 5' UTR Spy\_sRNA480642

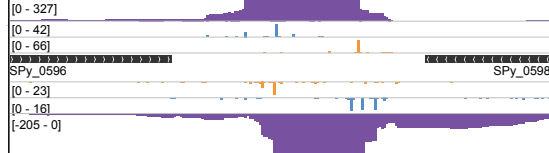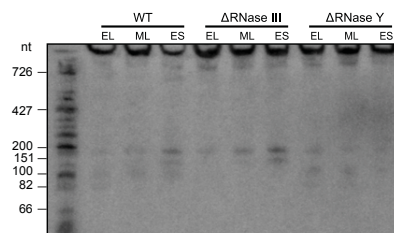

5S rRNA

### 5' UTR Spy\_sRNA480696

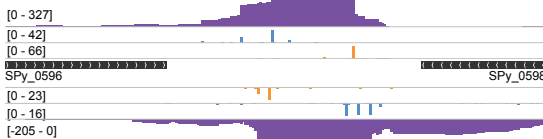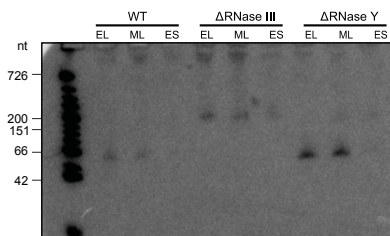

5S rRNA

### 3' UTR Spy\_sRNA531081

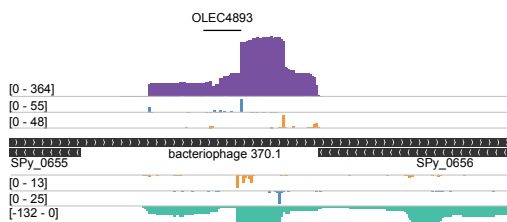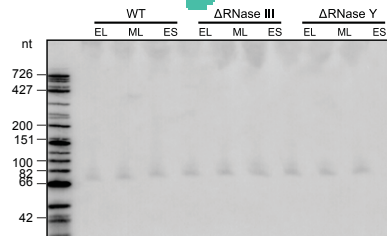

5S rRNA

### 3' UTR Spy\_sRNA532788

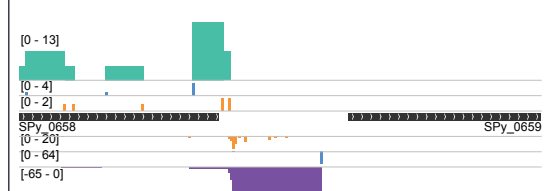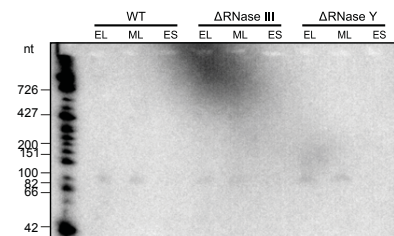

5S rRNA



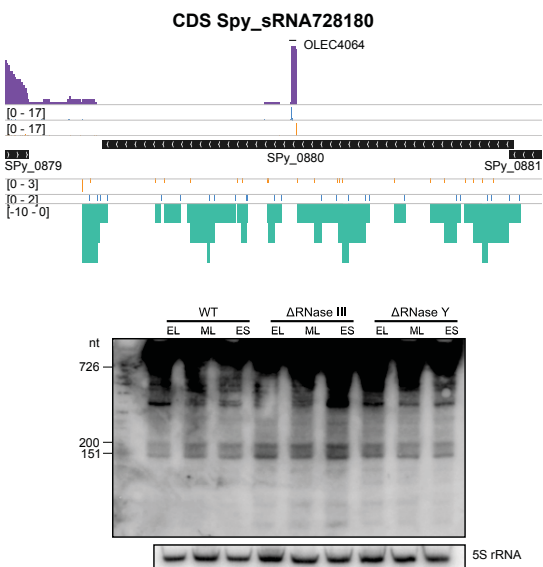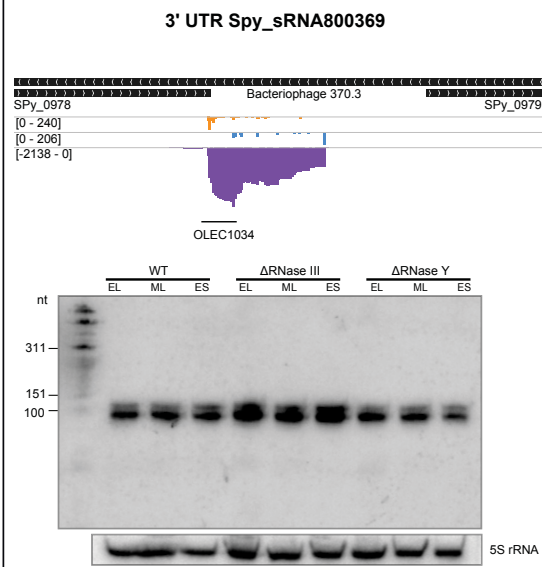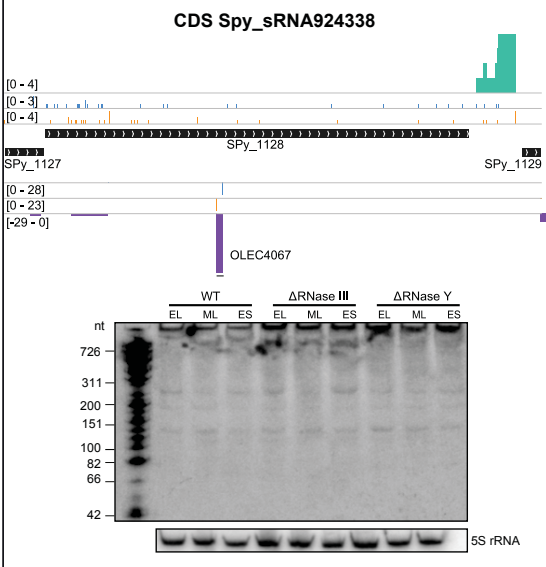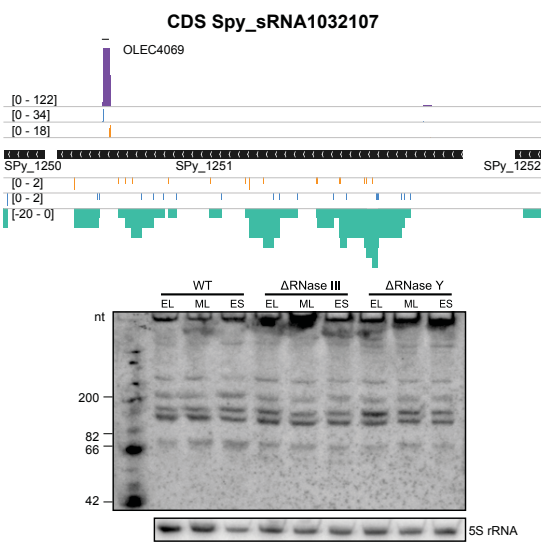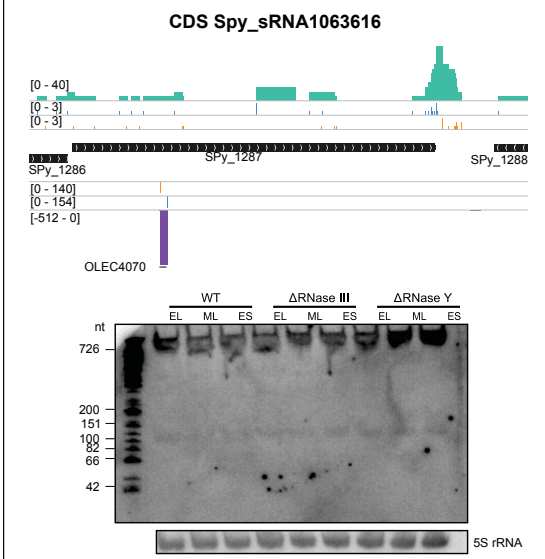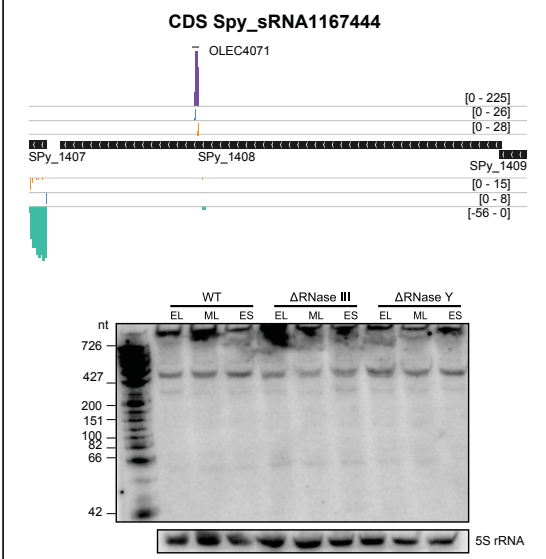

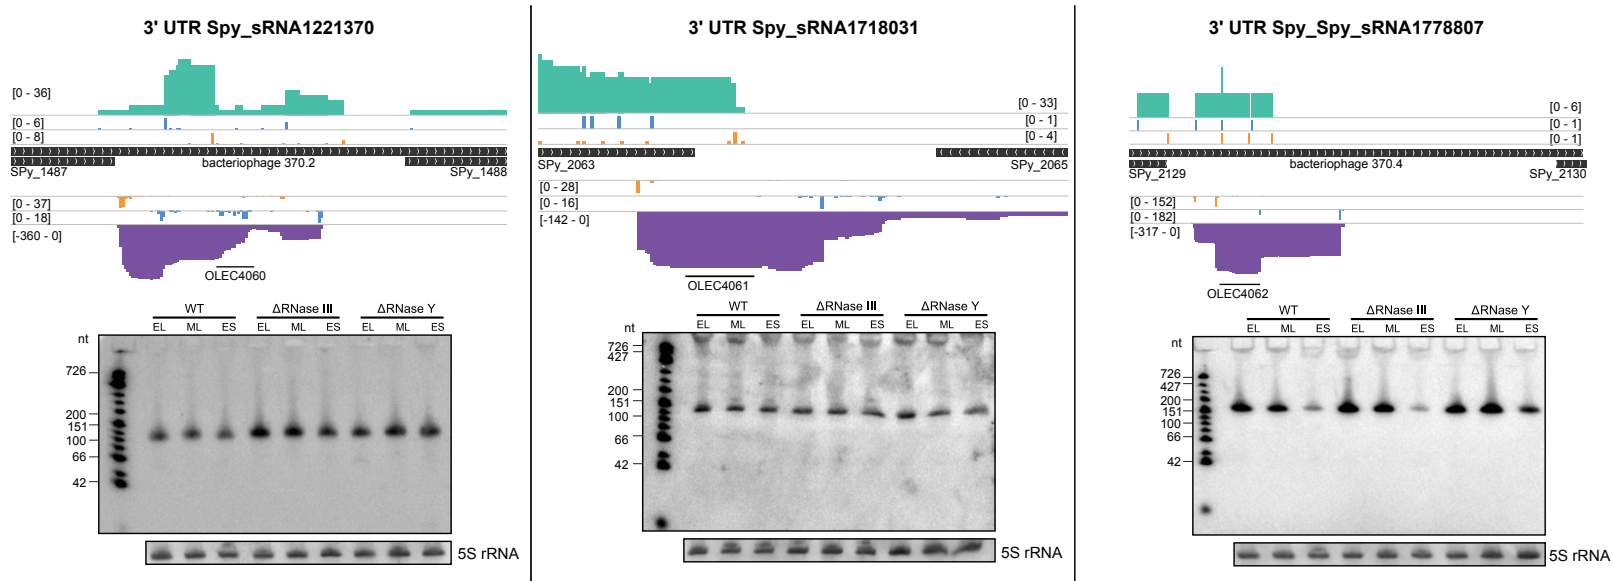

**Figure S6. Expression profiles of experimentally validated asRNAs**

Expression profiles of selected asRNAs and surrounding loci were captured using the Integrative Genomics Viewer (IGV) software. The sequence coverage was calculated using BEDTools-Version-2.15.0 and the scale is given in number of reads per million. The putative asRNAs are represented in purple and the other transcripts are shown in green. The distribution of reads starting (5') and ending (3') at each nucleotide position is indicated in blue and orange, respectively. Transcripts from the positive strand are represented above the locus drawn in black and transcripts from the negative strand are represented below. The positions of the primers used in Northern blot analysis (OLEC) are indicated. Northern blot expression profiling (polyacrylamide gel electrophoresis) was analyzed in WT (SF370),  $\Delta$ RNase III ( $\Delta mc$ ) and  $\Delta$ RNase Y ( $\Delta my$ ) strains grown to early logarithmic (EL), mid logarithmic (ML) and early stationary (ES) phases. The approximate size of fragments was estimated according to the  $\Phi$ X174 DNA/HinfI Marker (Fermentas®). 5S rRNA specific hybridization pattern was used as a reference.

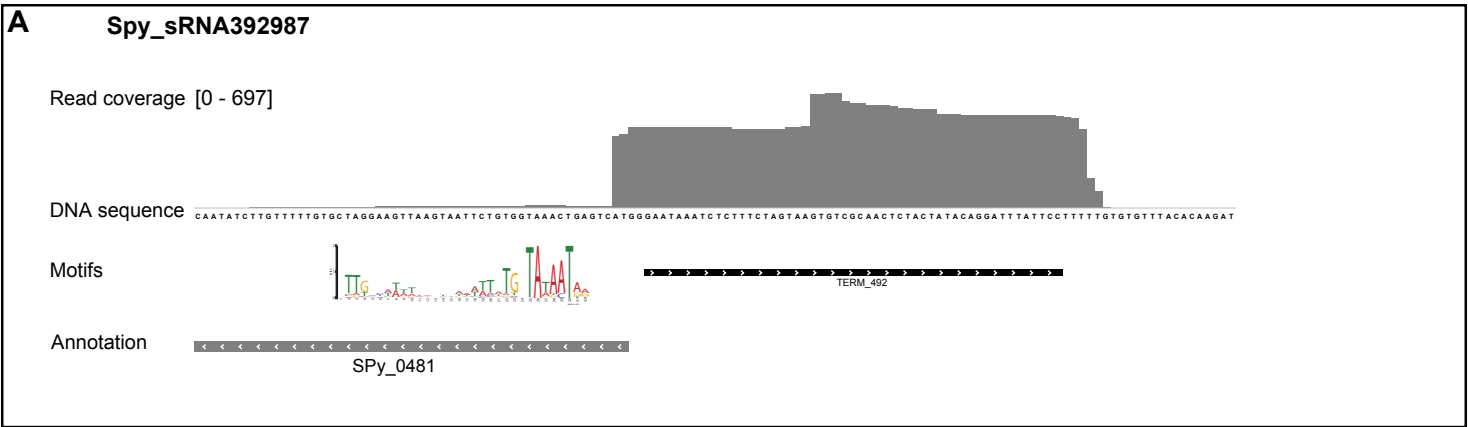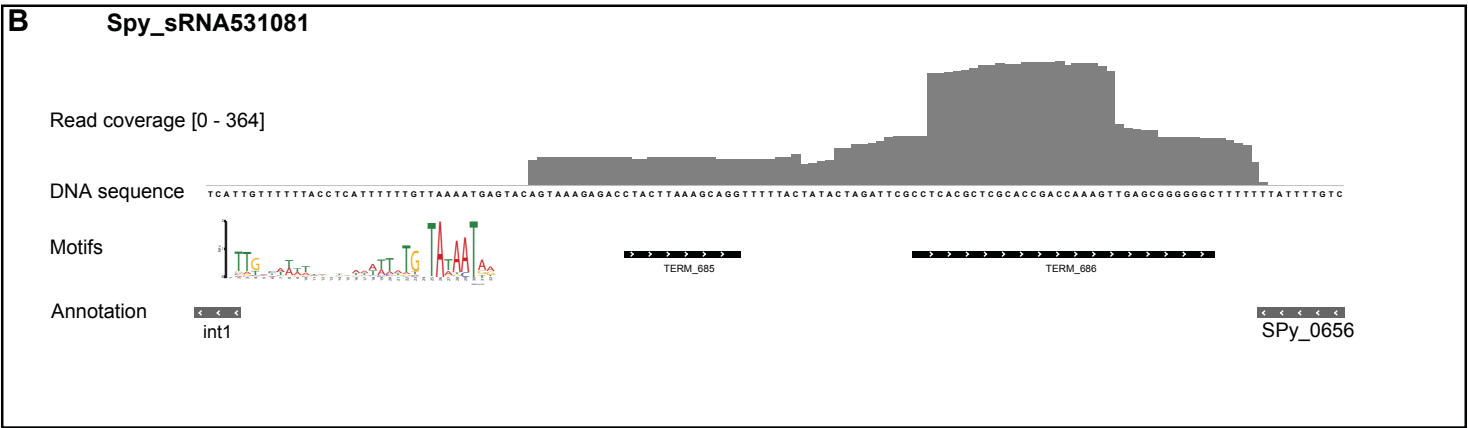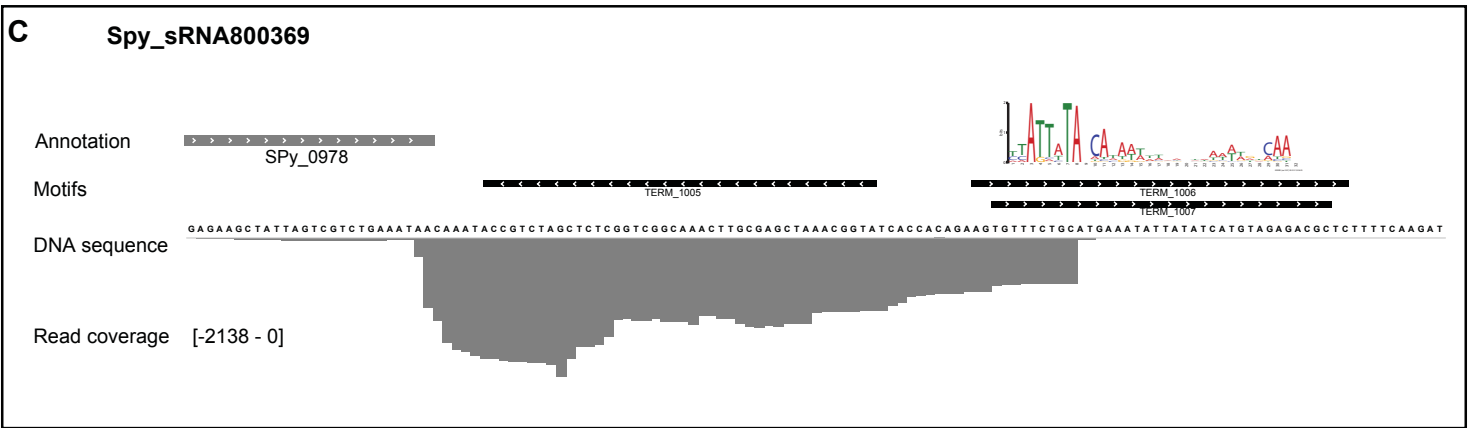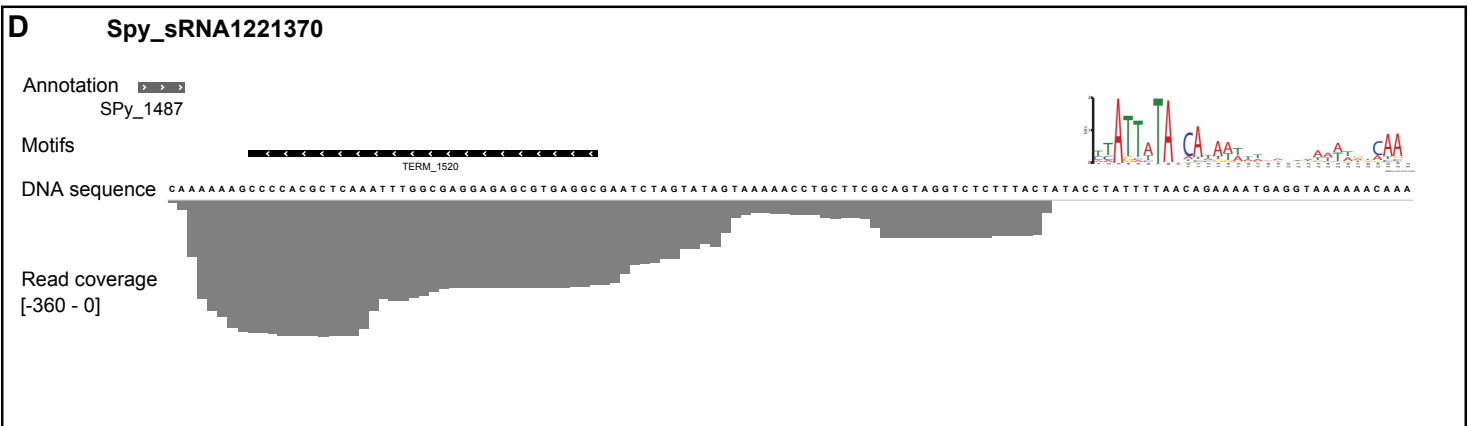

### **Figure S7. Expression profiles of selected asRNAs**

sRNA sequencing expression profiles of four selected asRNAs captured using the Integrative Genomics Viewer (IGV) software. The sequence coverage was calculated using BEDTools-Version-2.15.0 and the scale is given in number of reads per million. For each sRNA, the predicted promoter region (logo obtained by MEME v 4.9.1) and terminator region (using TransTermHP v2.07<sup>83</sup> (downloaded from [http://transterm.cbcb.umd.edu/tt/Streptococcus\\_pyogenes\\_M1\\_GAS.tt](http://transterm.cbcb.umd.edu/tt/Streptococcus_pyogenes_M1_GAS.tt))) are indicated.
